# Supplementary material for: Retrospective Evaluation and Framework Development of Bone Anisotropic Material Behavior Compared with Elastic, Elastic-Plastic, and Hyper-Elastic Properties
Source: MDPI journal article supplement (doi:10.3390/bioengineering9010009), 2021-12-29
Supplement: s1 [file s1]

Supplementary materials A

The elastic constants

| No | Race | Age | Gender | Weight<br>(lbs) | Height            | BMI  | Cortical | Trabecular | Side  | E1    | E2    | E3    | ν12   | ν23   | ν31   | G12   | G23   | G31   |
|----|------|-----|--------|-----------------|-------------------|------|----------|------------|-------|-------|-------|-------|-------|-------|-------|-------|-------|-------|
|    |      |     |        |                 | (feet,<br>inches) |      |          |            |       | (GPa) | (GPa) | (GPa) |       |       |       |       |       |       |
| 1  | c    | 23  | f      | 276             | 5.5               | 45.9 | 1.15802  | 0.93508    | Right | 1.027 | 1.027 | 1.706 | 0.400 | 0.250 | 0.250 | 0.046 | 0.058 | 0.053 |
| 2  | c    | 23  | f      | 276             | 5.5               | 45.9 | 1.11037  | 0.97599    | Left  | 1.108 | 1.108 | 1.830 | 0.400 | 0.250 | 0.250 | 0.051 | 0.063 | 0.058 |
| 5  | b    | 37  | f      | 176             | 5.6               | 28.4 | 1.275308 | 1.111324   | Right | 1.396 | 1.396 | 2.264 | 0.400 | 0.250 | 0.250 | 0.066 | 0.082 | 0.076 |
| 6  | b    | 37  | f      | 176             | 5.6               | 28.4 | 1.227658 | 1.093279   | Left  | 1.356 | 1.356 | 2.204 | 0.400 | 0.250 | 0.250 | 0.063 | 0.079 | 0.073 |
| 7  | m    | 40  | f      | 214             | 5.8               | 32.5 | 1.200805 | 1.044722   | Right | 1.251 | 1.251 | 2.046 | 0.400 | 0.250 | 0.250 | 0.058 | 0.072 | 0.067 |
| 8  | m    | 40  | f      | 214             | 5.8               | 32.5 | 1.153155 | 1.018775   | Left  | 1.196 | 1.196 | 1.963 | 0.400 | 0.250 | 0.250 | 0.055 | 0.069 | 0.064 |
| 9  | b    | 41  | f      | 280             | 5.3               | 49.7 | 1.286914 | 1.057654   | Right | 1.278 | 1.278 | 2.087 | 0.400 | 0.250 | 0.250 | 0.059 | 0.074 | 0.068 |
| 10 | b    | 41  | f      | 280             | 5.3               | 49.7 | 1.334564 | 1.200184   | Left  | 1.601 | 1.601 | 2.568 | 0.400 | 0.250 | 0.250 | 0.076 | 0.095 | 0.088 |
| 11 | c    | 41  | f      | 103             | 5.2               | 18.9 | 1.114696 | 0.86099    | Right | 0.886 | 0.886 | 1.490 | 0.400 | 0.250 | 0.250 | 0.039 | 0.049 | 0.045 |
| 12 | c    | 41  | f      | 103             | 5.2               | 18.9 | 1.162346 | 1.027966   | Left  | 1.215 | 1.215 | 1.992 | 0.400 | 0.250 | 0.250 | 0.056 | 0.070 | 0.065 |
| 13 | c    | 47  | f      | 138             | 6.1               | 18.3 | 1.084958 | 0.877674   | Right | 0.917 | 0.917 | 1.537 | 0.400 | 0.250 | 0.250 | 0.041 | 0.051 | 0.047 |
| 14 | c    | 47  | f      | 138             | 6.1               | 18.3 | 1.037308 | 0.902928   | Left  | 0.965 | 0.965 | 1.610 | 0.400 | 0.250 | 0.250 | 0.043 | 0.054 | 0.050 |
| 15 | c    | 51  | f      | 152             | 5.7               | 24.2 | 1.054411 | 0.835433   | Right | 0.840 | 0.840 | 1.418 | 0.400 | 0.250 | 0.250 | 0.037 | 0.046 | 0.043 |
| 16 | c    | 51  | f      | 152             | 5.7               | 24.2 | 1.102061 | 0.967681   | Left  | 1.091 | 1.091 | 1.804 | 0.400 | 0.250 | 0.250 | 0.050 | 0.062 | 0.057 |
| 17 | c    | 54  | f      | 141             | 5.8               | 21.9 | 1.019796 | 0.873569   | Right | 0.910 | 0.910 | 1.525 | 0.400 | 0.250 | 0.250 | 0.041 | 0.050 | 0.047 |
| 18 | c    | 54  | f      | 130             | 5.5               | 21.6 | 1.009598 | 0.827355   | Right | 0.826 | 0.826 | 1.395 | 0.400 | 0.250 | 0.250 | 0.036 | 0.045 | 0.042 |
| 19 | c    | 54  | f      | 141             | 5.8               | 21.9 | 0.972146 | 0.837766   | Left  | 0.844 | 0.844 | 1.424 | 0.400 | 0.250 | 0.250 | 0.037 | 0.046 | 0.043 |
| 20 | c    | 54  | f      | 130             | 5.5               | 21.6 | 1.057248 | 0.922868   | Left  | 1.003 | 1.003 | 1.669 | 0.400 | 0.250 | 0.250 | 0.045 | 0.056 | 0.052 |
| 21 | c    | 55  | f      | 173             | 5.1               | 32.7 | 0.9994   | 0.757805   | Right | 0.706 | 0.706 | 1.208 | 0.400 | 0.250 | 0.250 | 0.030 | 0.038 | 0.035 |
| 22 | c    | 55  | f      | 173             | 5.1               | 32.7 | 0.95175  | 0.81737    | Left  | 0.808 | 0.808 | 1.368 | 0.400 | 0.250 | 0.250 | 0.035 | 0.044 | 0.041 |
| 23 | c    | 56  | f      | 229             | 5.2               | 41.9 | 1.001169 | 0.784242   | Right | 0.751 | 0.751 | 1.278 | 0.400 | 0.250 | 0.250 | 0.033 | 0.041 | 0.038 |
| 24 | c    | 56  | f      | 157             | 5.6               | 25.4 | 0.981146 | 0.682268   | Right | 0.586 | 0.586 | 1.017 | 0.400 | 0.250 | 0.250 | 0.025 | 0.031 | 0.028 |

|    |   |    |   |     |       |      |          |          |           |       |       |       |       |       |       |       |       |       |
|----|---|----|---|-----|-------|------|----------|----------|-----------|-------|-------|-------|-------|-------|-------|-------|-------|-------|
| 25 | c | 56 | f | 223 | 5.10. | 32.1 | 1.011181 | 0.841812 | Righ<br>t | 0.852 | 0.852 | 1.436 | 0.400 | 0.250 | 0.250 | 0.038 | 0.047 | 0.043 |
| 26 | c | 56 | f | 229 | 5.2   | 41.9 | 0.953519 | 0.81914  | Left      | 0.811 | 0.811 | 1.373 | 0.400 | 0.250 | 0.250 | 0.036 | 0.044 | 0.041 |
| 27 | c | 56 | f | 157 | 5.6   | 25.4 | 1.028796 | 0.894416 | Left      | 0.949 | 0.949 | 1.586 | 0.400 | 0.250 | 0.250 | 0.042 | 0.053 | 0.049 |
| 28 | c | 56 | f | 223 | 5.10. | 32.1 | 1.058831 | 0.924451 | Left      | 1.006 | 1.006 | 1.674 | 0.400 | 0.250 | 0.250 | 0.045 | 0.057 | 0.052 |
| 29 | b | 58 | f | 251 | 5.6   | 40.6 | 0.960014 | 0.740362 | Righ<br>t | 0.678 | 0.678 | 1.163 | 0.400 | 0.250 | 0.250 | 0.029 | 0.036 | 0.034 |
| 30 | b | 58 | f | 251 | 5.6   | 40.6 | 1.007664 | 0.873285 | Left      | 0.909 | 0.909 | 1.525 | 0.400 | 0.250 | 0.250 | 0.040 | 0.050 | 0.047 |
| 31 | c | 58 | f | 218 | 5.7   | 34.1 | 0.975886 | 0.75175  | Righ<br>t | 0.696 | 0.696 | 1.192 | 0.400 | 0.250 | 0.250 | 0.030 | 0.037 | 0.035 |
| 32 | c | 58 | f | 156 | 5.1   | 29.6 | 0.956368 | 0.717993 | Righ<br>t | 0.642 | 0.642 | 1.106 | 0.400 | 0.250 | 0.250 | 0.027 | 0.034 | 0.032 |
| 33 | c | 58 | f | 218 | 5.7   | 34.1 | 0.928236 | 0.793856 | Left      | 0.767 | 0.767 | 1.304 | 0.400 | 0.250 | 0.250 | 0.033 | 0.042 | 0.039 |
| 34 | c | 58 | f | 156 | 5.1   | 29.6 | 0.908718 | 0.774338 | Left      | 0.734 | 0.734 | 1.252 | 0.400 | 0.250 | 0.250 | 0.032 | 0.040 | 0.037 |
| 35 | b | 59 | f | 160 | 5.6   | 25.9 | 1.094391 | 0.861632 | Righ<br>t | 0.888 | 0.888 | 1.491 | 0.400 | 0.250 | 0.250 | 0.039 | 0.049 | 0.045 |
| 36 | b | 59 | f | 160 | 5.6   | 25.9 | 1.046741 | 0.912361 | Left      | 0.983 | 0.983 | 1.638 | 0.400 | 0.250 | 0.250 | 0.044 | 0.055 | 0.051 |
| 37 | b | 60 | f | 259 | 5.4   | 44.6 | 1.116726 | 0.893158 | Righ<br>t | 0.946 | 0.946 | 1.582 | 0.400 | 0.250 | 0.250 | 0.042 | 0.053 | 0.049 |
| 38 | b | 60 | f | 259 | 5.4   | 44.6 | 1.069076 | 0.934696 | Left      | 1.026 | 1.026 | 1.704 | 0.400 | 0.250 | 0.250 | 0.046 | 0.058 | 0.053 |
| 39 | c | 60 | f | 246 | 5.6   | 39.8 | 0.932479 | 0.722467 | Righ<br>t | 0.649 | 0.649 | 1.117 | 0.400 | 0.250 | 0.250 | 0.028 | 0.035 | 0.032 |
| 40 | c | 60 | f | 114 | 5.4   | 19.6 | 0.941994 | 0.766445 | Righ<br>t | 0.721 | 0.721 | 1.231 | 0.400 | 0.250 | 0.250 | 0.031 | 0.039 | 0.036 |
| 41 | c | 60 | f | 246 | 5.6   | 39.8 | 0.980129 | 0.84575  | Left      | 0.859 | 0.859 | 1.447 | 0.400 | 0.250 | 0.250 | 0.038 | 0.047 | 0.044 |
| 42 | c | 60 | f | 114 | 5.4   | 19.6 | 0.989644 | 0.855265 | Left      | 0.876 | 0.876 | 1.473 | 0.400 | 0.250 | 0.250 | 0.039 | 0.048 | 0.045 |
| 43 | c | 61 | f | 115 | 5.5   | 19.1 | 0.95151  | 0.686932 | Righ<br>t | 0.593 | 0.593 | 1.029 | 0.400 | 0.250 | 0.250 | 0.025 | 0.031 | 0.029 |
| 44 | c | 61 | f | 115 | 5.5   | 19.1 | 0.99916  | 0.86478  | Left      | 0.893 | 0.893 | 1.500 | 0.400 | 0.250 | 0.250 | 0.040 | 0.049 | 0.046 |
| 45 | b | 62 | f | 181 | 5.9   | 26.8 | 1.089424 | 0.807417 | Righ<br>t | 0.791 | 0.791 | 1.341 | 0.400 | 0.250 | 0.250 | 0.035 | 0.043 | 0.040 |
| 46 | b | 62 | f | 181 | 5.9   | 26.8 | 1.137074 | 1.002695 | Left      | 1.163 | 1.163 | 1.912 | 0.400 | 0.250 | 0.250 | 0.053 | 0.066 | 0.062 |
| 47 | c | 62 | f | 207 | 5     | 40.6 | 0.911407 | 0.660264 | Righ<br>t | 0.553 | 0.553 | 0.964 | 0.400 | 0.250 | 0.250 | 0.023 | 0.029 | 0.027 |
| 48 | c | 62 | f | 207 | 5     | 40.6 | 0.920707 | 0.724478 | Righ<br>t | 0.652 | 0.652 | 1.122 | 0.400 | 0.250 | 0.250 | 0.028 | 0.035 | 0.032 |
| 49 | c | 62 | f | 170 | 5.5   | 29.3 | 0.943958 | 0.699563 | Righ<br>t | 0.613 | 0.613 | 1.060 | 0.400 | 0.250 | 0.250 | 0.026 | 0.032 | 0.030 |
| 50 | c | 62 | f | 207 | 5     | 40.6 | 0.863757 | 0.729378 | Left      | 0.660 | 0.660 | 1.135 | 0.400 | 0.250 | 0.250 | 0.028 | 0.035 | 0.033 |
| 51 | c | 62 | f | 207 | 5     | 40.6 | 0.873057 | 0.738678 | Left      | 0.675 | 0.675 | 1.159 | 0.400 | 0.250 | 0.250 | 0.029 | 0.036 | 0.033 |
| 52 | c | 62 | f | 170 | 5.5   | 29.3 | 0.991608 | 0.857228 | Left      | 0.880 | 0.880 | 1.479 | 0.400 | 0.250 | 0.250 | 0.039 | 0.049 | 0.045 |

|    |   |    |   |     |     |      |          |          |           |       |       |       |       |       |       |       |       |       |
|----|---|----|---|-----|-----|------|----------|----------|-----------|-------|-------|-------|-------|-------|-------|-------|-------|-------|
| 53 | c | 63 | f | 203 | 5.5 | 33.8 | 0.939308 | 0.71419  | Righ<br>t | 0.636 | 0.636 | 1.096 | 0.400 | 0.250 | 0.250 | 0.027 | 0.034 | 0.031 |
| 54 | c | 63 | f | 203 | 5.5 | 33.8 | 0.986958 | 0.852578 | Left      | 0.871 | 0.871 | 1.466 | 0.400 | 0.250 | 0.250 | 0.039 | 0.048 | 0.044 |
| 55 | b | 65 | f | 140 | 5.7 | 22   | 1.036671 | 0.893368 | Righ<br>t | 0.947 | 0.947 | 1.583 | 0.400 | 0.250 | 0.250 | 0.042 | 0.053 | 0.049 |
| 56 | b | 65 | f | 140 | 5.7 | 22   | 1.084321 | 0.949941 | Left      | 1.056 | 1.056 | 1.750 | 0.400 | 0.250 | 0.250 | 0.048 | 0.060 | 0.055 |
| 57 | c | 65 | f | 88  | 5.2 | 16.1 | 0.883897 | 0.681404 | Righ<br>t | 0.585 | 0.585 | 1.015 | 0.400 | 0.250 | 0.250 | 0.025 | 0.031 | 0.028 |
| 58 | c | 65 | f | 129 | 5.4 | 22.3 | 0.90413  | 0.719507 | Righ<br>t | 0.644 | 0.644 | 1.110 | 0.400 | 0.250 | 0.250 | 0.027 | 0.034 | 0.032 |
| 59 | c | 65 | f | 192 | 5.5 | 32.1 | 0.866219 | 0.629008 | Righ<br>t | 0.507 | 0.507 | 0.890 | 0.400 | 0.250 | 0.250 | 0.021 | 0.026 | 0.024 |
| 60 | c | 65 | f | 133 | 5.6 | 21.5 | 0.892736 | 0.711278 | Righ<br>t | 0.631 | 0.631 | 1.089 | 0.400 | 0.250 | 0.250 | 0.027 | 0.033 | 0.031 |
| 61 | c | 65 | f | 88  | 5.2 | 16.1 | 0.931547 | 0.797167 | Left      | 0.773 | 0.773 | 1.313 | 0.400 | 0.250 | 0.250 | 0.034 | 0.042 | 0.039 |
| 62 | c | 65 | f | 129 | 5.4 | 22.3 | 0.85648  | 0.7221   | Left      | 0.648 | 0.648 | 1.116 | 0.400 | 0.250 | 0.250 | 0.028 | 0.034 | 0.032 |
| 63 | c | 65 | f | 192 | 5.5 | 32.1 | 0.913869 | 0.779489 | Left      | 0.743 | 0.743 | 1.265 | 0.400 | 0.250 | 0.250 | 0.032 | 0.040 | 0.037 |
| 64 | c | 65 | f | 133 | 5.6 | 21.5 | 0.845086 | 0.710706 | Left      | 0.630 | 0.630 | 1.088 | 0.400 | 0.250 | 0.250 | 0.027 | 0.033 | 0.031 |
| 65 | b | 66 | f | 132 | 5.4 | 22.8 | 1.015937 | 0.774412 | Righ<br>t | 0.734 | 0.734 | 1.252 | 0.400 | 0.250 | 0.250 | 0.032 | 0.040 | 0.037 |
| 66 | b | 66 | f | 132 | 5.4 | 22.8 | 1.063587 | 0.929208 | Left      | 1.015 | 1.015 | 1.688 | 0.400 | 0.250 | 0.250 | 0.046 | 0.057 | 0.053 |
| 67 | c | 66 | f | 130 | 5.4 | 22.3 | 0.875058 | 0.723485 | Righ<br>t | 0.650 | 0.650 | 1.120 | 0.400 | 0.250 | 0.250 | 0.028 | 0.035 | 0.032 |
| 68 | c | 66 | f | 130 | 5.4 | 22.3 | 0.922708 | 0.788328 | Left      | 0.758 | 0.758 | 1.289 | 0.400 | 0.250 | 0.250 | 0.033 | 0.041 | 0.038 |
| 69 | c | 67 | f | 92  | 5.4 | 15.8 | 0.855833 | 0.662872 | Righ<br>t | 0.557 | 0.557 | 0.970 | 0.400 | 0.250 | 0.250 | 0.023 | 0.029 | 0.027 |
| 70 | c | 67 | f | 121 | 5.6 | 20   | 0.838716 | 0.604344 | Righ<br>t | 0.472 | 0.472 | 0.834 | 0.400 | 0.250 | 0.250 | 0.019 | 0.024 | 0.022 |
| 71 | c | 67 | f | 100 | 5.7 | 15.7 | 0.847275 | 0.599777 | Righ<br>t | 0.466 | 0.466 | 0.823 | 0.400 | 0.250 | 0.250 | 0.019 | 0.024 | 0.022 |
| 72 | c | 67 | f | 92  | 5.4 | 15.8 | 0.903483 | 0.769103 | Left      | 0.725 | 0.725 | 1.238 | 0.400 | 0.250 | 0.250 | 0.031 | 0.039 | 0.036 |
| 73 | c | 67 | f | 121 | 5.6 | 20   | 0.886366 | 0.751987 | Left      | 0.697 | 0.697 | 1.193 | 0.400 | 0.250 | 0.250 | 0.030 | 0.037 | 0.035 |
| 74 | c | 67 | f | 100 | 5.7 | 15.7 | 0.894925 | 0.760545 | Left      | 0.711 | 0.711 | 1.215 | 0.400 | 0.250 | 0.250 | 0.031 | 0.038 | 0.035 |
| 75 | b | 69 | f | 209 | 5.1 | 39.5 | 0.997418 | 0.766963 | Righ<br>t | 0.721 | 0.721 | 1.232 | 0.400 | 0.250 | 0.250 | 0.031 | 0.039 | 0.036 |
| 76 | b | 69 | f | 270 | 5.7 | 42.3 | 0.97747  | 0.824622 | Righ<br>t | 0.821 | 0.821 | 1.388 | 0.400 | 0.250 | 0.250 | 0.036 | 0.045 | 0.042 |
| 77 | b | 69 | f | 209 | 5.1 | 39.5 | 1.045068 | 0.910688 | Left      | 0.980 | 0.980 | 1.633 | 0.400 | 0.250 | 0.250 | 0.044 | 0.055 | 0.051 |
| 78 | b | 69 | f | 270 | 5.7 | 42.3 | 0.92982  | 0.79544  | Left      | 0.770 | 0.770 | 1.308 | 0.400 | 0.250 | 0.250 | 0.034 | 0.042 | 0.039 |
| 79 | c | 69 | f | 250 | 5.7 | 39.2 | 0.824416 | 0.596789 | Righ<br>t | 0.462 | 0.462 | 0.817 | 0.400 | 0.250 | 0.250 | 0.019 | 0.024 | 0.022 |

|     |   |    |   |     |      |       |          |          |           |       |       |       |       |       |       |       |       |       |
|-----|---|----|---|-----|------|-------|----------|----------|-----------|-------|-------|-------|-------|-------|-------|-------|-------|-------|
| 80  | c | 69 | f | 178 | 4.11 | 36    | 0.83266  | 0.587802 | Righ<br>t | 0.449 | 0.449 | 0.797 | 0.400 | 0.250 | 0.250 | 0.018 | 0.023 | 0.021 |
| 81  | c | 69 | f | 250 | 5.7  | 39.2  | 0.872066 | 0.737686 | Left      | 0.673 | 0.673 | 1.156 | 0.400 | 0.250 | 0.250 | 0.029 | 0.036 | 0.033 |
| 82  | c | 69 | f | 178 | 4.11 | 36    | 0.88031  | 0.745931 | Left      | 0.687 | 0.687 | 1.177 | 0.400 | 0.250 | 0.250 | 0.030 | 0.037 | 0.034 |
| 83  | b | 70 | f | 204 | 5.2  | 37.3  | 0.987444 | 0.747699 | Righ<br>t | 0.690 | 0.690 | 1.182 | 0.400 | 0.250 | 0.250 | 0.030 | 0.037 | 0.034 |
| 84  | b | 70 | f | 204 | 5.2  | 37.3  | 1.035094 | 0.900714 | Left      | 0.961 | 0.961 | 1.604 | 0.400 | 0.250 | 0.250 | 0.043 | 0.054 | 0.050 |
| 85  | c | 70 | f | 218 | 5.4  | 37.6  | 0.807928 | 0.621432 | Righ<br>t | 0.496 | 0.496 | 0.873 | 0.400 | 0.250 | 0.250 | 0.021 | 0.026 | 0.024 |
| 86  | c | 70 | f | 158 | 5    | 30.9  | 0.816172 | 0.658729 | Righ<br>t | 0.550 | 0.550 | 0.960 | 0.400 | 0.250 | 0.250 | 0.023 | 0.029 | 0.027 |
| 87  | c | 70 | f | 218 | 5.4  | 37.6  | 0.760278 | 0.625898 | Left      | 0.502 | 0.502 | 0.883 | 0.400 | 0.250 | 0.250 | 0.021 | 0.026 | 0.024 |
| 88  | c | 70 | f | 158 | 5    | 30.9  | 0.863822 | 0.729442 | Left      | 0.660 | 0.660 | 1.135 | 0.400 | 0.250 | 0.250 | 0.028 | 0.035 | 0.033 |
| 89  | b | 71 | f | 128 | 5.11 | 17.9  | 0.959232 | 0.710729 | Righ<br>t | 0.630 | 0.630 | 1.088 | 0.400 | 0.250 | 0.250 | 0.027 | 0.033 | 0.031 |
| 90  | b | 71 | f | 128 | 5.11 | 17.9  | 1.006882 | 0.872503 | Left      | 0.908 | 0.908 | 1.522 | 0.400 | 0.250 | 0.250 | 0.040 | 0.050 | 0.047 |
| 91  | c | 73 | f | 112 | 5    | 21.9  | 0.787213 | 0.654441 | Righ<br>t | 0.544 | 0.544 | 0.950 | 0.400 | 0.250 | 0.250 | 0.023 | 0.028 | 0.026 |
| 92  | c | 73 | f | 112 | 5    | 21.9  | 0.739563 | 0.605183 | Left      | 0.473 | 0.473 | 0.836 | 0.400 | 0.250 | 0.250 | 0.019 | 0.024 | 0.022 |
| 93  | c | 74 | f | 195 | 5.1  | 36.8  | 0.757866 | 0.565863 | Righ<br>t | 0.420 | 0.420 | 0.748 | 0.400 | 0.250 | 0.250 | 0.017 | 0.021 | 0.020 |
| 94  | c | 74 | f | 199 | 5.4  | 34    | 0.757866 | 0.550532 | Righ<br>t | 0.400 | 0.400 | 0.715 | 0.400 | 0.250 | 0.250 | 0.016 | 0.020 | 0.019 |
| 95  | c | 74 | f | 151 | 5.3  | 26.8  | 0.765599 | 0.533995 | Righ<br>t | 0.379 | 0.379 | 0.680 | 0.400 | 0.250 | 0.250 | 0.015 | 0.019 | 0.017 |
| 96  | c | 74 | f | 115 | 5    | 22.6  | 0.781066 | 0.54073  | Righ<br>t | 0.387 | 0.387 | 0.695 | 0.400 | 0.250 | 0.250 | 0.016 | 0.019 | 0.018 |
| 97  | c | 74 | f | 195 | 5.1  | 36.8  | 0.710216 | 0.575836 | Left      | 0.433 | 0.433 | 0.770 | 0.400 | 0.250 | 0.250 | 0.018 | 0.022 | 0.020 |
| 98  | c | 74 | f | 199 | 5.4  | 34    | 0.710216 | 0.575836 | Left      | 0.433 | 0.433 | 0.770 | 0.400 | 0.250 | 0.250 | 0.018 | 0.022 | 0.020 |
| 99  | c | 74 | f | 151 | 5.3  | 26.8  | 0.813249 | 0.678869 | Left      | 0.581 | 0.581 | 1.009 | 0.400 | 0.250 | 0.250 | 0.024 | 0.030 | 0.028 |
| 100 | c | 74 | f | 115 | 5    | 22.6  | 0.733416 | 0.599036 | Left      | 0.465 | 0.465 | 0.822 | 0.400 | 0.250 | 0.250 | 0.019 | 0.024 | 0.022 |
| 101 | c | 75 | f | 148 | 5.5  | 24.6  | 0.74285  | 0.502514 | Righ<br>t | 0.340 | 0.340 | 0.616 | 0.400 | 0.250 | 0.250 | 0.013 | 0.017 | 0.015 |
| 102 | c | 75 | f | 148 | 5.5  | 24.6  | 0.7905   | 0.65612  | Left      | 0.546 | 0.546 | 0.954 | 0.400 | 0.250 | 0.250 | 0.023 | 0.028 | 0.026 |
| 103 | c | 77 | f | 162 | 5    | 31.67 | 0.731137 | 0.596757 | Righ<br>t | 0.462 | 0.462 | 0.817 | 0.400 | 0.250 | 0.250 | 0.019 | 0.024 | 0.022 |
| 104 | c | 77 | f | 108 | 5    | 21.1  | 0.75801  | 0.485314 | Righ<br>t | 0.319 | 0.319 | 0.582 | 0.400 | 0.250 | 0.250 | 0.013 | 0.016 | 0.014 |
| 105 | c | 77 | f | 165 | 5.7  | 25.9  | 0.738449 | 0.50012  | Righ<br>t | 0.337 | 0.337 | 0.611 | 0.400 | 0.250 | 0.250 | 0.013 | 0.017 | 0.015 |
| 106 | c | 77 | f | 162 | 5    | 31.67 | 0.778787 | 0.644407 | Left      | 0.529 | 0.529 | 0.926 | 0.400 | 0.250 | 0.250 | 0.022 | 0.027 | 0.025 |
| 107 | c | 77 | f | 108 | 5    | 21.1  | 0.71036  | 0.575981 | Left      | 0.433 | 0.433 | 0.770 | 0.400 | 0.250 | 0.250 | 0.018 | 0.022 | 0.020 |

|     |   |    |   |     |     |      |          |          |           |       |       |       |       |       |       |       |       |       |
|-----|---|----|---|-----|-----|------|----------|----------|-----------|-------|-------|-------|-------|-------|-------|-------|-------|-------|
| 108 | c | 77 | f | 165 | 5.7 | 25.9 | 0.690799 | 0.556419 | Left      | 0.408 | 0.408 | 0.728 | 0.400 | 0.250 | 0.250 | 0.016 | 0.020 | 0.019 |
| 109 | c | 78 | f | 173 | 5.5 | 28.8 | 0.716514 | 0.488364 | Righ<br>t | 0.323 | 0.323 | 0.588 | 0.400 | 0.250 | 0.250 | 0.013 | 0.016 | 0.015 |
| 110 | c | 78 | f | 147 | 5   | 28.7 | 0.723826 | 0.60363  | Righ<br>t | 0.471 | 0.471 | 0.832 | 0.400 | 0.250 | 0.250 | 0.019 | 0.024 | 0.022 |
| 111 | c | 78 | f | 127 | 5.3 | 22.7 | 0.706946 | 0.44099  | Righ<br>t | 0.269 | 0.269 | 0.497 | 0.400 | 0.250 | 0.250 | 0.010 | 0.013 | 0.012 |
| 112 | c | 78 | f | 173 | 5.5 | 28.8 | 0.668864 | 0.534485 | Left      | 0.379 | 0.379 | 0.682 | 0.400 | 0.250 | 0.250 | 0.015 | 0.019 | 0.017 |
| 113 | c | 78 | f | 147 | 5   | 28.7 | 0.771476 | 0.637096 | Left      | 0.519 | 0.519 | 0.909 | 0.400 | 0.250 | 0.250 | 0.022 | 0.027 | 0.025 |
| 114 | c | 78 | f | 127 | 5.3 | 22.7 | 0.754596 | 0.620216 | Left      | 0.494 | 0.494 | 0.870 | 0.400 | 0.250 | 0.250 | 0.020 | 0.025 | 0.024 |
| 115 | c | 79 | f | 245 | 5.4 | 42.1 | 0.692709 | 0.457893 | Righ<br>t | 0.288 | 0.288 | 0.529 | 0.400 | 0.250 | 0.250 | 0.011 | 0.014 | 0.013 |
| 116 | c | 79 | f | 220 | 5.7 | 34.5 | 0.706946 | 0.576803 | Righ<br>t | 0.434 | 0.434 | 0.772 | 0.400 | 0.250 | 0.250 | 0.018 | 0.022 | 0.020 |
| 117 | c | 79 | f | 245 | 5.4 | 42.1 | 0.645059 | 0.510679 | Left      | 0.350 | 0.350 | 0.632 | 0.400 | 0.250 | 0.250 | 0.014 | 0.017 | 0.016 |
| 118 | c | 79 | f | 220 | 5.7 | 34.5 | 0.754596 | 0.620216 | Left      | 0.494 | 0.494 | 0.870 | 0.400 | 0.250 | 0.250 | 0.020 | 0.025 | 0.024 |
| 119 | c | 80 | f | 179 | 5   | 35   | 0.706846 | 0.456319 | Righ<br>t | 0.286 | 0.286 | 0.526 | 0.400 | 0.250 | 0.250 | 0.011 | 0.014 | 0.013 |
| 120 | c | 80 | f | 179 | 5   | 35   | 0.659196 | 0.524816 | Left      | 0.367 | 0.367 | 0.661 | 0.400 | 0.250 | 0.250 | 0.015 | 0.018 | 0.017 |
| 121 | b | 82 | f | 125 | 5.7 | 19.7 | 0.819924 | 0.560414 | Righ<br>t | 0.413 | 0.413 | 0.737 | 0.400 | 0.250 | 0.250 | 0.017 | 0.021 | 0.019 |
| 122 | b | 82 | f | 109 | 5.4 | 18.7 | 0.764808 | 0.531199 | Righ<br>t | 0.375 | 0.375 | 0.675 | 0.400 | 0.250 | 0.250 | 0.015 | 0.019 | 0.017 |
| 123 | b | 82 | f | 125 | 5.7 | 19.7 | 0.867574 | 0.733194 | Left      | 0.666 | 0.666 | 1.145 | 0.400 | 0.250 | 0.250 | 0.029 | 0.036 | 0.033 |
| 124 | b | 82 | f | 109 | 5.4 | 18.7 | 0.812458 | 0.678078 | Left      | 0.579 | 0.579 | 1.007 | 0.400 | 0.250 | 0.250 | 0.024 | 0.030 | 0.028 |
| 125 | c | 82 | f | 232 | 5.3 | 41.2 | 0.68555  | 0.565981 | Righ<br>t | 0.420 | 0.420 | 0.749 | 0.400 | 0.250 | 0.250 | 0.017 | 0.021 | 0.020 |
| 126 | c | 82 | f | 143 | 5.7 | 22.4 | 0.678695 | 0.399434 | Righ<br>t | 0.226 | 0.226 | 0.423 | 0.400 | 0.250 | 0.250 | 0.008 | 0.011 | 0.010 |
| 127 | c | 82 | f | 232 | 5.3 | 41.2 | 0.7332   | 0.598821 | Left      | 0.464 | 0.464 | 0.821 | 0.400 | 0.250 | 0.250 | 0.019 | 0.024 | 0.022 |
| 128 | c | 82 | f | 143 | 5.7 | 22.4 | 0.631045 | 0.496665 | Left      | 0.333 | 0.333 | 0.604 | 0.400 | 0.250 | 0.250 | 0.013 | 0.016 | 0.015 |
| 129 | b | 83 | f | 186 | 5.6 | 30.2 | 0.780416 | 0.546478 | Righ<br>t | 0.395 | 0.395 | 0.707 | 0.400 | 0.250 | 0.250 | 0.016 | 0.020 | 0.018 |
| 130 | b | 83 | f | 120 | 5.7 | 18.8 | 0.741464 | 0.521811 | Righ<br>t | 0.364 | 0.364 | 0.655 | 0.400 | 0.250 | 0.250 | 0.014 | 0.018 | 0.017 |
| 131 | b | 83 | f | 186 | 5.6 | 30.2 | 0.828066 | 0.693687 | Left      | 0.603 | 0.603 | 1.045 | 0.400 | 0.250 | 0.250 | 0.026 | 0.032 | 0.029 |
| 132 | b | 83 | f | 120 | 5.7 | 18.8 | 0.693814 | 0.559434 | Left      | 0.411 | 0.411 | 0.734 | 0.400 | 0.250 | 0.250 | 0.017 | 0.021 | 0.019 |
| 133 | c | 83 | f | 140 | 5.2 | 25.6 | 0.772612 | 0.531017 | Righ<br>t | 0.375 | 0.375 | 0.674 | 0.400 | 0.250 | 0.250 | 0.015 | 0.019 | 0.017 |
| 134 | c | 83 | f | 169 | 5.5 | 28.2 | 0.671839 | 0.437928 | Righ<br>t | 0.266 | 0.266 | 0.492 | 0.400 | 0.250 | 0.250 | 0.010 | 0.013 | 0.012 |
| 135 | c | 83 | f | 140 | 5.2 | 25.6 | 0.724962 | 0.590582 | Left      | 0.453 | 0.453 | 0.803 | 0.400 | 0.250 | 0.250 | 0.019 | 0.023 | 0.021 |

|     |   |    |   |     |     |      |          |          |           |       |       |       |       |       |       |       |       |       |
|-----|---|----|---|-----|-----|------|----------|----------|-----------|-------|-------|-------|-------|-------|-------|-------|-------|-------|
| 136 | c | 83 | f | 169 | 5.5 | 28.2 | 0.719489 | 0.58511  | Left      | 0.446 | 0.446 | 0.791 | 0.400 | 0.250 | 0.250 | 0.018 | 0.023 | 0.021 |
| 137 | b | 84 | f | 123 | 5.1 | 23.2 | 0.663859 | 0.424143 | Righ<br>t | 0.251 | 0.251 | 0.466 | 0.400 | 0.250 | 0.250 | 0.010 | 0.012 | 0.011 |
| 138 | b | 84 | f | 126 | 5.3 | 22.3 | 0.741464 | 0.60255  | Righ<br>t | 0.470 | 0.470 | 0.830 | 0.400 | 0.250 | 0.250 | 0.019 | 0.024 | 0.022 |
| 139 | b | 84 | f | 123 | 5.1 | 23.2 | 0.711509 | 0.57713  | Left      | 0.435 | 0.435 | 0.773 | 0.400 | 0.250 | 0.250 | 0.018 | 0.022 | 0.020 |
| 140 | b | 84 | f | 126 | 5.3 | 22.3 | 0.789114 | 0.654734 | Left      | 0.544 | 0.544 | 0.951 | 0.400 | 0.250 | 0.250 | 0.023 | 0.028 | 0.026 |
| 141 | c | 85 | f | 108 | 5   | 21.1 | 0.653894 | 0.450504 | Righ<br>t | 0.280 | 0.280 | 0.515 | 0.400 | 0.250 | 0.250 | 0.011 | 0.013 | 0.012 |
| 142 | c | 85 | f | 139 | 5.2 | 25.5 | 0.640816 | 0.510037 | Righ<br>t | 0.349 | 0.349 | 0.631 | 0.400 | 0.250 | 0.250 | 0.014 | 0.017 | 0.016 |
| 143 | c | 85 | f | 74  | 5.1 | 14   | 0.647355 | 0.401627 | Righ<br>t | 0.228 | 0.228 | 0.427 | 0.400 | 0.250 | 0.250 | 0.009 | 0.011 | 0.010 |
| 144 | c | 85 | f | 108 | 5   | 21.1 | 0.606244 | 0.471864 | Left      | 0.304 | 0.304 | 0.556 | 0.400 | 0.250 | 0.250 | 0.012 | 0.015 | 0.014 |
| 145 | c | 85 | f | 139 | 5.2 | 25.5 | 0.688466 | 0.554086 | Left      | 0.404 | 0.404 | 0.723 | 0.400 | 0.250 | 0.250 | 0.016 | 0.020 | 0.019 |
| 146 | c | 85 | f | 74  | 5.1 | 14   | 0.695005 | 0.560625 | Left      | 0.413 | 0.413 | 0.737 | 0.400 | 0.250 | 0.250 | 0.017 | 0.021 | 0.019 |
| 147 | c | 86 | f | 123 | 5   | 24   | 1.396307 | 1.396307 | Righ<br>t | 2.096 | 2.096 | 3.292 | 0.400 | 0.250 | 0.250 | 0.104 | 0.129 | 0.119 |
| 148 | c | 86 | f | 123 | 5   | 24   | 1.443957 | 1.309577 | Left      | 1.870 | 1.870 | 2.963 | 0.400 | 0.250 | 0.250 | 0.091 | 0.113 | 0.105 |
| 149 | b | 89 | f | 93  | 5.4 | 16   | 0.799176 | 0.569273 | Righ<br>t | 0.424 | 0.424 | 0.756 | 0.400 | 0.250 | 0.250 | 0.017 | 0.021 | 0.020 |
| 150 | b | 89 | f | 93  | 5.4 | 16   | 0.751526 | 0.617147 | Left      | 0.490 | 0.490 | 0.863 | 0.400 | 0.250 | 0.250 | 0.020 | 0.025 | 0.023 |
| 151 | c | 89 | f | 158 | 5.3 | 28.1 | 0.654047 | 0.502474 | Righ<br>t | 0.340 | 0.340 | 0.616 | 0.400 | 0.250 | 0.250 | 0.013 | 0.017 | 0.015 |
| 152 | c | 89 | f | 88  | 4.1 | 18.4 | 0.654047 | 0.473221 | Righ<br>t | 0.305 | 0.305 | 0.558 | 0.400 | 0.250 | 0.250 | 0.012 | 0.015 | 0.014 |
| 153 | c | 89 | f | 110 | 5.2 | 20.1 | 0.647507 | 0.445587 | Righ<br>t | 0.274 | 0.274 | 0.506 | 0.400 | 0.250 | 0.250 | 0.011 | 0.013 | 0.012 |
| 154 | c | 89 | f | 115 | 5.3 | 20.5 | 0.660588 | 0.440525 | Righ<br>t | 0.269 | 0.269 | 0.496 | 0.400 | 0.250 | 0.250 | 0.010 | 0.013 | 0.012 |
| 155 | c | 89 | f | 158 | 5.3 | 28.1 | 0.701697 | 0.567317 | Left      | 0.422 | 0.422 | 0.752 | 0.400 | 0.250 | 0.250 | 0.017 | 0.021 | 0.020 |
| 156 | c | 89 | f | 88  | 4.1 | 18.4 | 0.701697 | 0.567317 | Left      | 0.422 | 0.422 | 0.752 | 0.400 | 0.250 | 0.250 | 0.017 | 0.021 | 0.020 |
| 157 | c | 89 | f | 110 | 5.2 | 20.1 | 0.599857 | 0.465477 | Left      | 0.297 | 0.297 | 0.543 | 0.400 | 0.250 | 0.250 | 0.012 | 0.014 | 0.013 |
| 158 | c | 89 | f | 115 | 5.3 | 20.5 | 0.708238 | 0.573858 | Left      | 0.431 | 0.431 | 0.766 | 0.400 | 0.250 | 0.250 | 0.017 | 0.022 | 0.020 |
| 159 | c | 90 | f | 156 | 5.4 | 26.8 | 0.623631 | 0.416044 | Righ<br>t | 0.243 | 0.243 | 0.452 | 0.400 | 0.250 | 0.250 | 0.009 | 0.011 | 0.011 |
| 160 | c | 90 | f | 130 | 5.6 | 21   | 0.629995 | 0.402268 | Righ<br>t | 0.229 | 0.229 | 0.428 | 0.400 | 0.250 | 0.250 | 0.009 | 0.011 | 0.010 |
| 161 | c | 90 | f | 156 | 5.4 | 26.8 | 0.671281 | 0.536901 | Left      | 0.382 | 0.382 | 0.687 | 0.400 | 0.250 | 0.250 | 0.015 | 0.019 | 0.018 |
| 162 | c | 90 | f | 130 | 5.6 | 21   | 0.677645 | 0.543265 | Left      | 0.391 | 0.391 | 0.700 | 0.400 | 0.250 | 0.250 | 0.016 | 0.020 | 0.018 |
| 163 | c | 91 | f | 152 | 5.7 | 23.8 | 0.636358 | 0.404759 | Righ<br>t | 0.231 | 0.231 | 0.432 | 0.400 | 0.250 | 0.250 | 0.009 | 0.011 | 0.010 |

|     |   |    |   |     |       |      |          |          |           |       |       |       |       |       |       |       |       |       |
|-----|---|----|---|-----|-------|------|----------|----------|-----------|-------|-------|-------|-------|-------|-------|-------|-------|-------|
| 164 | c | 91 | f | 152 | 5.7   | 23.8 | 0.588708 | 0.454329 | Left      | 0.284 | 0.284 | 0.522 | 0.400 | 0.250 | 0.250 | 0.011 | 0.014 | 0.013 |
| 165 | c | 95 | f | 94  | 5.2   | 17.3 | 0.600981 | 0.351331 | Righ<br>t | 0.180 | 0.180 | 0.342 | 0.400 | 0.250 | 0.250 | 0.007 | 0.008 | 0.008 |
| 166 | c | 95 | f | 115 | 5.3   | 20.4 | 0.588961 | 0.355063 | Righ<br>t | 0.183 | 0.183 | 0.348 | 0.400 | 0.250 | 0.250 | 0.007 | 0.008 | 0.008 |
| 167 | c | 95 | f | 94  | 5.2   | 17.3 | 0.553331 | 0.418951 | Left      | 0.246 | 0.246 | 0.457 | 0.400 | 0.250 | 0.250 | 0.009 | 0.012 | 0.011 |
| 168 | c | 95 | f | 115 | 5.3   | 20.4 | 0.541311 | 0.406931 | Left      | 0.233 | 0.233 | 0.436 | 0.400 | 0.250 | 0.250 | 0.009 | 0.011 | 0.010 |
| 3   | c | 65 | m | 164 | 5.10. | 23.9 | 1.179845 | 0.958491 | Righ<br>t | 1.073 | 1.073 | 1.776 | 0.400 | 0.250 | 0.250 | 0.049 | 0.061 | 0.056 |
| 4   | c | 65 | m | 164 | 5.10. | 23.9 | 1.227495 | 1.093116 | Left      | 1.356 | 1.356 | 2.203 | 0.400 | 0.250 | 0.250 | 0.063 | 0.079 | 0.073 |
| 169 | c | 26 | m | 150 | 5.11  | 21   | 1.33942  | 1.099911 | Righ<br>t | 1.371 | 1.371 | 2.226 | 0.400 | 0.250 | 0.250 | 0.064 | 0.080 | 0.074 |
| 170 | c | 26 | m | 150 | 5.11  | 21   | 1.38707  | 1.25269  | Left      | 1.728 | 1.728 | 2.755 | 0.400 | 0.250 | 0.250 | 0.083 | 0.104 | 0.096 |
| 171 | b | 34 | m | 173 | 5.7   | 27.1 | 1.494392 | 1.29863  | Righ<br>t | 1.842 | 1.842 | 2.923 | 0.400 | 0.250 | 0.250 | 0.090 | 0.111 | 0.103 |
| 172 | b | 34 | m | 173 | 5.7   | 27.1 | 1.446742 | 1.312362 | Left      | 1.877 | 1.877 | 2.974 | 0.400 | 0.250 | 0.250 | 0.091 | 0.114 | 0.105 |
| 173 | b | 45 | m | 345 | 6.2   | 44.3 | 1.410038 | 1.238871 | Righ<br>t | 1.694 | 1.694 | 2.705 | 0.400 | 0.250 | 0.250 | 0.081 | 0.101 | 0.094 |
| 174 | b | 45 | m | 345 | 6.2   | 44.3 | 1.362388 | 1.228008 | Left      | 1.668 | 1.668 | 2.667 | 0.400 | 0.250 | 0.250 | 0.080 | 0.100 | 0.092 |
| 175 | c | 45 | m | 191 | 5.9   | 28.3 | 1.241185 | 1.04591  | Righ<br>t | 1.253 | 1.253 | 2.049 | 0.400 | 0.250 | 0.250 | 0.058 | 0.072 | 0.067 |
| 176 | c | 45 | m | 191 | 5.9   | 28.3 | 1.288835 | 1.154455 | Left      | 1.494 | 1.494 | 2.410 | 0.400 | 0.250 | 0.250 | 0.071 | 0.088 | 0.082 |
| 177 | c | 46 | m | 192 | 5.7   | 30.1 | 1.237487 | 0.996625 | Righ<br>t | 1.150 | 1.150 | 1.893 | 0.400 | 0.250 | 0.250 | 0.053 | 0.066 | 0.061 |
| 178 | c | 46 | m | 192 | 5.7   | 30.1 | 1.189837 | 1.055457 | Left      | 1.274 | 1.274 | 2.080 | 0.400 | 0.250 | 0.250 | 0.059 | 0.074 | 0.068 |
| 179 | b | 48 | m | 443 | 6.6   | 51   | 1.402525 | 1.354875 | Righ<br>t | 1.987 | 1.987 | 3.133 | 0.400 | 0.250 | 0.250 | 0.097 | 0.121 | 0.112 |
| 180 | b | 48 | m | 443 | 6.6   | 51   | 1.184625 | 1.220495 | Left      | 1.650 | 1.650 | 2.640 | 0.400 | 0.250 | 0.250 | 0.079 | 0.098 | 0.091 |
| 181 | c | 50 | m | 338 | 6.2   | 43.4 | 1.242518 | 1.020299 | Righ<br>t | 1.199 | 1.199 | 1.968 | 0.400 | 0.250 | 0.250 | 0.055 | 0.069 | 0.064 |
| 182 | c | 50 | m | 338 | 6.2   | 43.4 | 1.194868 | 1.060488 | Left      | 1.284 | 1.284 | 2.097 | 0.400 | 0.250 | 0.250 | 0.060 | 0.074 | 0.069 |
| 183 | c | 51 | m | 295 | 6.4   | 35.9 | 1.207976 | 0.988323 | Righ<br>t | 1.133 | 1.133 | 1.868 | 0.400 | 0.250 | 0.250 | 0.052 | 0.065 | 0.060 |
| 184 | c | 51 | m | 200 | 6.2   | 25.7 | 1.207976 | 1.015015 | Righ<br>t | 1.188 | 1.188 | 1.951 | 0.400 | 0.250 | 0.250 | 0.055 | 0.068 | 0.063 |
| 185 | c | 51 | m | 167 | 5.4   | 28.8 | 1.242518 | 1.054656 | Righ<br>t | 1.272 | 1.272 | 2.078 | 0.400 | 0.250 | 0.250 | 0.059 | 0.074 | 0.068 |
| 186 | c | 51 | m | 295 | 6.4   | 35.9 | 1.255626 | 1.121246 | Left      | 1.418 | 1.418 | 2.297 | 0.400 | 0.250 | 0.250 | 0.067 | 0.083 | 0.077 |
| 187 | c | 51 | m | 200 | 6.2   | 25.7 | 1.255626 | 1.121246 | Left      | 1.418 | 1.418 | 2.297 | 0.400 | 0.250 | 0.250 | 0.067 | 0.083 | 0.077 |
| 188 | c | 51 | m | 167 | 5.4   | 28.8 | 1.194868 | 1.060488 | Left      | 1.284 | 1.284 | 2.097 | 0.400 | 0.250 | 0.250 | 0.060 | 0.074 | 0.069 |
| 189 | c | 52 | m | 178 | 6     | 24.5 | 1.199672 | 1.038087 | Righ<br>t | 1.237 | 1.237 | 2.024 | 0.400 | 0.250 | 0.250 | 0.057 | 0.071 | 0.066 |

|     |   |    |   |     |       |      |          |          |           |       |       |       |       |       |       |       |       |       |
|-----|---|----|---|-----|-------|------|----------|----------|-----------|-------|-------|-------|-------|-------|-------|-------|-------|-------|
| 190 | c | 52 | m | 178 | 6     | 24.5 | 1.247322 | 1.112942 | Left      | 1.400 | 1.400 | 2.269 | 0.400 | 0.250 | 0.250 | 0.066 | 0.082 | 0.076 |
| 191 | b | 53 | m | 195 | 4     | 59.5 | 1.374138 | 1.217924 | Righ<br>t | 1.643 | 1.643 | 2.631 | 0.400 | 0.250 | 0.250 | 0.079 | 0.098 | 0.091 |
| 192 | b | 53 | m | 195 | 4     | 59.5 | 1.421788 | 1.287408 | Left      | 1.814 | 1.814 | 2.881 | 0.400 | 0.250 | 0.250 | 0.088 | 0.110 | 0.101 |
| 193 | c | 53 | m | 181 | 5.11  | 25.2 | 1.224155 | 1.033853 | Righ<br>t | 1.228 | 1.228 | 2.011 | 0.400 | 0.250 | 0.250 | 0.057 | 0.071 | 0.065 |
| 194 | c | 53 | m | 171 | 5.7   | 26.9 | 1.211914 | 1.059576 | Righ<br>t | 1.283 | 1.283 | 2.094 | 0.400 | 0.250 | 0.250 | 0.060 | 0.074 | 0.069 |
| 195 | c | 53 | m | 181 | 5.11  | 25.2 | 1.176505 | 1.042126 | Left      | 1.245 | 1.245 | 2.037 | 0.400 | 0.250 | 0.250 | 0.058 | 0.072 | 0.066 |
| 196 | c | 53 | m | 171 | 5.7   | 26.9 | 1.164264 | 1.029884 | Left      | 1.219 | 1.219 | 1.998 | 0.400 | 0.250 | 0.250 | 0.056 | 0.070 | 0.065 |
| 197 | c | 54 | m | 208 | 5.10. | 29.9 | 1.22864  | 0.998146 | Righ<br>t | 1.153 | 1.153 | 1.898 | 0.400 | 0.250 | 0.250 | 0.053 | 0.066 | 0.061 |
| 198 | c | 54 | m | 220 | 6.2   | 28.3 | 1.234723 | 1.00428  | Righ<br>t | 1.166 | 1.166 | 1.917 | 0.400 | 0.250 | 0.250 | 0.054 | 0.067 | 0.062 |
| 199 | c | 54 | m | 181 | 5.9   | 26.8 | 1.235574 | 1.016166 | Righ<br>t | 1.191 | 1.191 | 1.955 | 0.400 | 0.250 | 0.250 | 0.055 | 0.068 | 0.063 |
| 200 | c | 54 | m | 208 | 5.10. | 29.9 | 1.18099  | 1.046611 | Left      | 1.255 | 1.255 | 2.052 | 0.400 | 0.250 | 0.250 | 0.058 | 0.072 | 0.067 |
| 201 | c | 54 | m | 220 | 6.2   | 28.3 | 1.282373 | 1.147993 | Left      | 1.479 | 1.479 | 2.388 | 0.400 | 0.250 | 0.250 | 0.070 | 0.087 | 0.081 |
| 202 | c | 54 | m | 181 | 5.9   | 26.8 | 1.187924 | 1.053545 | Left      | 1.270 | 1.270 | 2.074 | 0.400 | 0.250 | 0.250 | 0.059 | 0.073 | 0.068 |
| 203 | b | 55 | m | 177 | 6     | 24.1 | 1.216476 | 0.973821 | Righ<br>t | 1.104 | 1.104 | 1.823 | 0.400 | 0.250 | 0.250 | 0.050 | 0.063 | 0.058 |
| 204 | b | 55 | m | 189 | 5.6   | 30.6 | 1.363481 | 1.222112 | Righ<br>t | 1.653 | 1.653 | 2.646 | 0.400 | 0.250 | 0.250 | 0.079 | 0.099 | 0.091 |
| 205 | b | 55 | m | 177 | 6     | 24.1 | 1.264126 | 1.129746 | Left      | 1.438 | 1.438 | 2.326 | 0.400 | 0.250 | 0.250 | 0.068 | 0.084 | 0.078 |
| 206 | b | 55 | m | 189 | 5.6   | 30.6 | 1.411131 | 1.276751 | Left      | 1.787 | 1.787 | 2.842 | 0.400 | 0.250 | 0.250 | 0.087 | 0.108 | 0.100 |
| 207 | c | 55 | m | 209 | 5.8   | 31.8 | 1.192146 | 1.026605 | Righ<br>t | 1.212 | 1.212 | 1.988 | 0.400 | 0.250 | 0.250 | 0.056 | 0.070 | 0.064 |
| 208 | c | 55 | m | 209 | 5.8   | 31.8 | 1.239796 | 1.105416 | Left      | 1.383 | 1.383 | 2.244 | 0.400 | 0.250 | 0.250 | 0.065 | 0.081 | 0.075 |
| 209 | b | 57 | m | 170 | 5.8   | 25.9 | 1.319786 | 1.166825 | Righ<br>t | 1.523 | 1.523 | 2.452 | 0.400 | 0.250 | 0.250 | 0.072 | 0.090 | 0.083 |
| 210 | b | 57 | m | 170 | 5.8   | 25.9 | 1.272136 | 1.137757 | Left      | 1.456 | 1.456 | 2.353 | 0.400 | 0.250 | 0.250 | 0.069 | 0.086 | 0.079 |
| 211 | c | 57 | m | 158 | 5.8   | 24   | 1.346721 | 1.209611 | Righ<br>t | 1.623 | 1.623 | 2.601 | 0.400 | 0.250 | 0.250 | 0.078 | 0.097 | 0.090 |
| 212 | c | 57 | m | 198 | 5.5   | 33   | 1.189006 | 0.945319 | Righ<br>t | 1.047 | 1.047 | 1.736 | 0.400 | 0.250 | 0.250 | 0.047 | 0.059 | 0.055 |
| 213 | c | 57 | m | 243 | 6     | 33   | 1.221972 | 1.013767 | Righ<br>t | 1.186 | 1.186 | 1.947 | 0.400 | 0.250 | 0.250 | 0.055 | 0.068 | 0.063 |
| 214 | c | 57 | m | 158 | 5.8   | 24   | 1.299071 | 1.164691 | Left      | 1.518 | 1.518 | 2.445 | 0.400 | 0.250 | 0.250 | 0.072 | 0.090 | 0.083 |
| 215 | c | 57 | m | 198 | 5.5   | 33   | 1.236656 | 1.102276 | Left      | 1.376 | 1.376 | 2.234 | 0.400 | 0.250 | 0.250 | 0.065 | 0.080 | 0.074 |
| 216 | c | 57 | m | 243 | 6     | 33   | 1.269622 | 1.135243 | Left      | 1.450 | 1.450 | 2.344 | 0.400 | 0.250 | 0.250 | 0.068 | 0.085 | 0.079 |
| 217 | c | 58 | m | 205 | 6     | 24.8 | 1.232629 | 1.015637 | Righ<br>t | 1.189 | 1.189 | 1.953 | 0.400 | 0.250 | 0.250 | 0.055 | 0.068 | 0.063 |



|     |   |    |   |     |       |      |          |          |           |       |       |       |       |       |       |       |       |       |
|-----|---|----|---|-----|-------|------|----------|----------|-----------|-------|-------|-------|-------|-------|-------|-------|-------|-------|
| 218 | c | 58 | m | 190 | 5.6   | 30.7 | 1.221972 | 1.008722 | Righ<br>t | 1.175 | 1.175 | 1.931 | 0.400 | 0.250 | 0.250 | 0.054 | 0.067 | 0.062 |
| 219 | c | 58 | m | 205 | 6     | 24.8 | 1.280279 | 1.145899 | Left      | 1.474 | 1.474 | 2.380 | 0.400 | 0.250 | 0.250 | 0.070 | 0.087 | 0.080 |
| 220 | c | 58 | m | 190 | 5.6   | 30.7 | 1.174322 | 1.039943 | Left      | 1.241 | 1.241 | 2.030 | 0.400 | 0.250 | 0.250 | 0.057 | 0.072 | 0.066 |
| 221 | c | 59 | m | 178 | 5.10. | 25.6 | 1.203914 | 1.008737 | Righ<br>t | 1.175 | 1.175 | 1.931 | 0.400 | 0.250 | 0.250 | 0.054 | 0.067 | 0.062 |
| 222 | c | 59 | m | 200 | 5.10. | 28.7 | 1.179835 | 0.923566 | Righ<br>t | 1.004 | 1.004 | 1.671 | 0.400 | 0.250 | 0.250 | 0.045 | 0.056 | 0.052 |
| 223 | c | 59 | m | 143 | 5.9   | 21.2 | 1.215953 | 1.088681 | Righ<br>t | 1.346 | 1.346 | 2.189 | 0.400 | 0.250 | 0.250 | 0.063 | 0.078 | 0.073 |
| 224 | c | 59 | m | 178 | 5.10. | 25.6 | 1.251564 | 1.117184 | Left      | 1.409 | 1.409 | 2.283 | 0.400 | 0.250 | 0.250 | 0.066 | 0.083 | 0.076 |
| 225 | c | 59 | m | 200 | 5.10. | 28.7 | 1.227485 | 1.093106 | Left      | 1.356 | 1.356 | 2.203 | 0.400 | 0.250 | 0.250 | 0.063 | 0.079 | 0.073 |
| 226 | c | 59 | m | 143 | 5.9   | 21.2 | 1.263603 | 1.129223 | Left      | 1.436 | 1.436 | 2.324 | 0.400 | 0.250 | 0.250 | 0.068 | 0.084 | 0.078 |
| 227 | b | 60 | m | 270 | 6     | 36.6 | 1.329776 | 1.141377 | Righ<br>t | 1.464 | 1.464 | 2.365 | 0.400 | 0.250 | 0.250 | 0.069 | 0.086 | 0.080 |
| 228 | b | 60 | m | 270 | 6     | 36.6 | 1.282126 | 1.147746 | Left      | 1.479 | 1.479 | 2.387 | 0.400 | 0.250 | 0.250 | 0.070 | 0.087 | 0.081 |
| 229 | c | 60 | m | 204 | 5.5   | 34   | 1.186058 | 0.969525 | Righ<br>t | 1.095 | 1.095 | 1.810 | 0.400 | 0.250 | 0.250 | 0.050 | 0.062 | 0.058 |
| 230 | c | 60 | m | 150 | 5.8   | 22.9 | 1.191875 | 0.958677 | Righ<br>t | 1.073 | 1.073 | 1.777 | 0.400 | 0.250 | 0.250 | 0.049 | 0.061 | 0.056 |
| 231 | c | 60 | m | 166 | 6     | 22.3 | 1.216009 | 1.000046 | Righ<br>t | 1.157 | 1.157 | 1.904 | 0.400 | 0.250 | 0.250 | 0.053 | 0.066 | 0.061 |
| 232 | c | 60 | m | 204 | 5.5   | 34   | 1.138408 | 1.004028 | Left      | 1.165 | 1.165 | 1.917 | 0.400 | 0.250 | 0.250 | 0.054 | 0.067 | 0.062 |
| 233 | c | 60 | m | 150 | 5.8   | 22.9 | 1.239525 | 1.105145 | Left      | 1.382 | 1.382 | 2.243 | 0.400 | 0.250 | 0.250 | 0.065 | 0.081 | 0.075 |
| 234 | c | 60 | m | 166 | 6     | 22.3 | 1.263659 | 1.129279 | Left      | 1.437 | 1.437 | 2.324 | 0.400 | 0.250 | 0.250 | 0.068 | 0.084 | 0.078 |
| 235 | c | 61 | m | 169 | 5.8   | 25.7 | 1.198038 | 0.986214 | Righ<br>t | 1.129 | 1.129 | 1.861 | 0.400 | 0.250 | 0.250 | 0.052 | 0.064 | 0.060 |
| 236 | c | 61 | m | 190 | 5.6   | 30.7 | 1.174077 | 0.980775 | Righ<br>t | 1.118 | 1.118 | 1.844 | 0.400 | 0.250 | 0.250 | 0.051 | 0.064 | 0.059 |
| 237 | c | 61 | m | 253 | 5.11  | 35.3 | 1.165986 | 0.923287 | Righ<br>t | 1.004 | 1.004 | 1.670 | 0.400 | 0.250 | 0.250 | 0.045 | 0.056 | 0.052 |
| 238 | c | 61 | m | 255 | 6     | 34.6 | 1.210018 | 0.967636 | Righ<br>t | 1.091 | 1.091 | 1.804 | 0.400 | 0.250 | 0.250 | 0.050 | 0.062 | 0.057 |
| 239 | c | 61 | m | 187 | 5.10. | 26.8 | 1.188038 | 0.943643 | Righ<br>t | 1.043 | 1.043 | 1.731 | 0.400 | 0.250 | 0.250 | 0.047 | 0.059 | 0.054 |
| 240 | c | 61 | m | 150 | 5.8   | 22.8 | 1.188782 | 0.952082 | Righ<br>t | 1.060 | 1.060 | 1.757 | 0.400 | 0.250 | 0.250 | 0.048 | 0.060 | 0.055 |
| 241 | c | 61 | m | 169 | 5.8   | 25.7 | 1.150388 | 1.016008 | Left      | 1.190 | 1.190 | 1.954 | 0.400 | 0.250 | 0.250 | 0.055 | 0.068 | 0.063 |
| 242 | c | 61 | m | 190 | 5.6   | 30.7 | 1.221727 | 1.087347 | Left      | 1.343 | 1.343 | 2.184 | 0.400 | 0.250 | 0.250 | 0.063 | 0.078 | 0.072 |
| 243 | c | 61 | m | 253 | 5.11  | 35.3 | 1.118336 | 0.983957 | Left      | 1.124 | 1.124 | 1.854 | 0.400 | 0.250 | 0.250 | 0.051 | 0.064 | 0.059 |
| 244 | c | 61 | m | 255 | 6     | 34.6 | 1.257668 | 1.123289 | Left      | 1.423 | 1.423 | 2.304 | 0.400 | 0.250 | 0.250 | 0.067 | 0.083 | 0.077 |
| 245 | c | 61 | m | 187 | 5.10. | 26.8 | 1.140388 | 1.006008 | Left      | 1.169 | 1.169 | 1.923 | 0.400 | 0.250 | 0.250 | 0.054 | 0.067 | 0.062 |

|     |   |    |   |     |       |      |          |          |           |       |       |       |       |       |       |       |       |       |
|-----|---|----|---|-----|-------|------|----------|----------|-----------|-------|-------|-------|-------|-------|-------|-------|-------|-------|
| 246 | c | 61 | m | 150 | 5.8   | 22.8 | 1.141132 | 1.006752 | Left      | 1.171 | 1.171 | 1.925 | 0.400 | 0.250 | 0.250 | 0.054 | 0.067 | 0.062 |
| 247 | c | 62 | m | 239 | 5.10. | 34.3 | 1.213271 | 0.977302 | Righ<br>t | 1.111 | 1.111 | 1.834 | 0.400 | 0.250 | 0.250 | 0.051 | 0.063 | 0.058 |
| 248 | c | 62 | m | 329 | 6.4   | 40.1 | 1.165986 | 0.953512 | Righ<br>t | 1.063 | 1.063 | 1.761 | 0.400 | 0.250 | 0.250 | 0.048 | 0.060 | 0.056 |
| 249 | c | 62 | m | 194 | 5.10. | 27.8 | 1.177884 | 0.952534 | Righ<br>t | 1.061 | 1.061 | 1.758 | 0.400 | 0.250 | 0.250 | 0.048 | 0.060 | 0.056 |
| 250 | c | 62 | m | 224 | 6     | 30.5 | 1.199903 | 0.971957 | Righ<br>t | 1.100 | 1.100 | 1.817 | 0.400 | 0.250 | 0.250 | 0.050 | 0.062 | 0.058 |
| 251 | c | 62 | m | 319 | 6.4   | 38.8 | 1.198723 | 0.958742 | Righ<br>t | 1.073 | 1.073 | 1.777 | 0.400 | 0.250 | 0.250 | 0.049 | 0.061 | 0.056 |
| 252 | c | 62 | m | 239 | 5.10. | 34.3 | 1.165621 | 1.031242 | Left      | 1.222 | 1.222 | 2.003 | 0.400 | 0.250 | 0.250 | 0.056 | 0.070 | 0.065 |
| 253 | c | 62 | m | 329 | 6.4   | 40.1 | 1.213636 | 1.079257 | Left      | 1.325 | 1.325 | 2.158 | 0.400 | 0.250 | 0.250 | 0.062 | 0.077 | 0.071 |
| 254 | c | 62 | m | 194 | 5.10. | 27.8 | 1.225534 | 1.091154 | Left      | 1.351 | 1.351 | 2.197 | 0.400 | 0.250 | 0.250 | 0.063 | 0.079 | 0.073 |
| 255 | c | 62 | m | 224 | 6     | 30.5 | 1.247553 | 1.113173 | Left      | 1.400 | 1.400 | 2.270 | 0.400 | 0.250 | 0.250 | 0.066 | 0.082 | 0.076 |
| 256 | c | 62 | m | 319 | 6.4   | 38.8 | 1.151073 | 1.016693 | Left      | 1.192 | 1.192 | 1.956 | 0.400 | 0.250 | 0.250 | 0.055 | 0.068 | 0.063 |
| 257 | b | 63 | m | 243 | 6.2   | 31.3 | 1.2716   | 1.069921 | Righ<br>t | 1.305 | 1.305 | 2.127 | 0.400 | 0.250 | 0.250 | 0.061 | 0.076 | 0.070 |
| 258 | b | 63 | m | 243 | 6.2   | 31.3 | 1.31925  | 1.18487  | Left      | 1.565 | 1.565 | 2.515 | 0.400 | 0.250 | 0.250 | 0.075 | 0.093 | 0.086 |
| 259 | c | 63 | m | 354 | 6.4   | 43.1 | 1.189782 | 0.950174 | Righ<br>t | 1.056 | 1.056 | 1.751 | 0.400 | 0.250 | 0.250 | 0.048 | 0.060 | 0.055 |
| 260 | c | 63 | m | 210 | 5.8   | 31.9 | 1.168047 | 0.962836 | Righ<br>t | 1.082 | 1.082 | 1.789 | 0.400 | 0.250 | 0.250 | 0.049 | 0.061 | 0.057 |
| 261 | c | 63 | m | 174 | 5.5   | 29   | 1.20168  | 1.041845 | Righ<br>t | 1.245 | 1.245 | 2.036 | 0.400 | 0.250 | 0.250 | 0.058 | 0.072 | 0.066 |
| 262 | c | 63 | m | 244 | 6.1   | 32.2 | 1.189582 | 0.955743 | Righ<br>t | 1.067 | 1.067 | 1.768 | 0.400 | 0.250 | 0.250 | 0.049 | 0.060 | 0.056 |
| 263 | c | 63 | m | 354 | 6.4   | 43.1 | 1.237432 | 1.103052 | Left      | 1.378 | 1.378 | 2.236 | 0.400 | 0.250 | 0.250 | 0.065 | 0.080 | 0.074 |
| 264 | c | 63 | m | 210 | 5.8   | 31.9 | 1.120397 | 0.986017 | Left      | 1.128 | 1.128 | 1.861 | 0.400 | 0.250 | 0.250 | 0.052 | 0.064 | 0.059 |
| 265 | c | 63 | m | 174 | 5.5   | 29   | 1.24933  | 1.11495  | Left      | 1.404 | 1.404 | 2.276 | 0.400 | 0.250 | 0.250 | 0.066 | 0.082 | 0.076 |
| 266 | c | 63 | m | 244 | 6.1   | 32.2 | 1.237232 | 1.102852 | Left      | 1.377 | 1.377 | 2.236 | 0.400 | 0.250 | 0.250 | 0.065 | 0.080 | 0.074 |
| 267 | b | 64 | m | 139 | 5.7   | 21.9 | 1.297551 | 1.111549 | Righ<br>t | 1.397 | 1.397 | 2.265 | 0.400 | 0.250 | 0.250 | 0.066 | 0.082 | 0.076 |
| 268 | b | 64 | m | 139 | 5.7   | 21.9 | 1.249901 | 1.115521 | Left      | 1.406 | 1.406 | 2.278 | 0.400 | 0.250 | 0.250 | 0.066 | 0.082 | 0.076 |
| 269 | c | 64 | m | 179 | 5.9   | 26.4 | 1.197543 | 0.989956 | Righ<br>t | 1.136 | 1.136 | 1.873 | 0.400 | 0.250 | 0.250 | 0.052 | 0.065 | 0.060 |
| 270 | c | 64 | m | 200 | 5.5   | 33.4 | 1.179745 | 1.061953 | Righ<br>t | 1.288 | 1.288 | 2.101 | 0.400 | 0.250 | 0.250 | 0.060 | 0.075 | 0.069 |
| 271 | c | 64 | m | 145 | 5.6   | 23.4 | 1.178845 | 0.990054 | Righ<br>t | 1.137 | 1.137 | 1.873 | 0.400 | 0.250 | 0.250 | 0.052 | 0.065 | 0.060 |
| 272 | c | 64 | m | 179 | 5.9   | 26.4 | 1.149893 | 1.015513 | Left      | 1.189 | 1.189 | 1.953 | 0.400 | 0.250 | 0.250 | 0.055 | 0.068 | 0.063 |
| 273 | c | 64 | m | 200 | 5.5   | 33.4 | 1.227395 | 1.093016 | Left      | 1.355 | 1.355 | 2.203 | 0.400 | 0.250 | 0.250 | 0.063 | 0.079 | 0.073 |

|     |   |    |   |     |       |      |          |          |           |       |       |       |       |       |       |       |       |       |
|-----|---|----|---|-----|-------|------|----------|----------|-----------|-------|-------|-------|-------|-------|-------|-------|-------|-------|
| 274 | c | 64 | m | 145 | 5.6   | 23.4 | 1.131195 | 0.996816 | Left      | 1.150 | 1.150 | 1.894 | 0.400 | 0.250 | 0.250 | 0.053 | 0.066 | 0.061 |
| 275 | b | 65 | m | 144 | 5.9   | 21.3 | 1.255719 | 1.056246 | Righ<br>t | 1.275 | 1.275 | 2.083 | 0.400 | 0.250 | 0.250 | 0.059 | 0.074 | 0.068 |
| 276 | b | 65 | m | 207 | 5.9   | 30.7 | 1.268532 | 1.000648 | Righ<br>t | 1.158 | 1.158 | 1.906 | 0.400 | 0.250 | 0.250 | 0.053 | 0.066 | 0.061 |
| 277 | b | 65 | m | 144 | 5.9   | 21.3 | 1.303369 | 1.168989 | Left      | 1.528 | 1.528 | 2.460 | 0.400 | 0.250 | 0.250 | 0.073 | 0.090 | 0.084 |
| 278 | b | 65 | m | 207 | 5.9   | 30.7 | 1.220882 | 1.086502 | Left      | 1.341 | 1.341 | 2.182 | 0.400 | 0.250 | 0.250 | 0.063 | 0.078 | 0.072 |
| 279 | c | 65 | m | 161 | 5.10. | 23.1 | 1.156248 | 0.958017 | Righ<br>t | 1.072 | 1.072 | 1.775 | 0.400 | 0.250 | 0.250 | 0.049 | 0.061 | 0.056 |
| 280 | c | 65 | m | 205 | 6.1   | 27.1 | 1.189578 | 0.974936 | Righ<br>t | 1.106 | 1.106 | 1.826 | 0.400 | 0.250 | 0.250 | 0.050 | 0.063 | 0.058 |
| 281 | c | 65 | m | 143 | 5.6   | 23.1 | 1.178845 | 1.037456 | Righ<br>t | 1.235 | 1.235 | 2.022 | 0.400 | 0.250 | 0.250 | 0.057 | 0.071 | 0.066 |
| 282 | c | 65 | m | 247 | 5.9   | 36.5 | 1.177745 | 1.036356 | Righ<br>t | 1.233 | 1.233 | 2.019 | 0.400 | 0.250 | 0.250 | 0.057 | 0.071 | 0.066 |
| 283 | c | 65 | m | 161 | 5.10. | 23.1 | 1.108598 | 0.974219 | Left      | 1.104 | 1.104 | 1.824 | 0.400 | 0.250 | 0.250 | 0.050 | 0.063 | 0.058 |
| 284 | c | 65 | m | 205 | 6.1   | 27.1 | 1.237228 | 1.102848 | Left      | 1.377 | 1.377 | 2.236 | 0.400 | 0.250 | 0.250 | 0.065 | 0.080 | 0.074 |
| 285 | c | 65 | m | 143 | 5.6   | 23.1 | 1.131195 | 0.996816 | Left      | 1.150 | 1.150 | 1.894 | 0.400 | 0.250 | 0.250 | 0.053 | 0.066 | 0.061 |
| 286 | c | 65 | m | 247 | 5.9   | 36.5 | 1.130095 | 0.995716 | Left      | 1.148 | 1.148 | 1.891 | 0.400 | 0.250 | 0.250 | 0.053 | 0.066 | 0.061 |
| 287 | b | 66 | m | 199 | 5.8   | 30.3 | 1.279847 | 1.058581 | Righ<br>t | 1.280 | 1.280 | 2.090 | 0.400 | 0.250 | 0.250 | 0.059 | 0.074 | 0.069 |
| 288 | b | 66 | m | 199 | 5.8   | 30.3 | 1.232197 | 1.097817 | Left      | 1.366 | 1.366 | 2.219 | 0.400 | 0.250 | 0.250 | 0.064 | 0.080 | 0.074 |
| 289 | c | 66 | m | 181 | 5.6   | 30.3 | 1.169693 | 0.916258 | Righ<br>t | 0.990 | 0.990 | 1.650 | 0.400 | 0.250 | 0.250 | 0.045 | 0.056 | 0.051 |
| 290 | c | 66 | m | 214 | 6.2   | 27.5 | 1.157996 | 0.974575 | Righ<br>t | 1.105 | 1.105 | 1.825 | 0.400 | 0.250 | 0.250 | 0.050 | 0.063 | 0.058 |
| 291 | c | 66 | m | 181 | 5.6   | 30.3 | 1.122043 | 0.987663 | Left      | 1.132 | 1.132 | 1.866 | 0.400 | 0.250 | 0.250 | 0.052 | 0.064 | 0.060 |
| 292 | c | 66 | m | 214 | 6.2   | 27.5 | 1.205646 | 1.071266 | Left      | 1.308 | 1.308 | 2.132 | 0.400 | 0.250 | 0.250 | 0.061 | 0.076 | 0.070 |
| 293 | b | 67 | m | 123 | 5.9   | 18.2 | 1.281346 | 1.155527 | Righ<br>t | 1.497 | 1.497 | 2.413 | 0.400 | 0.250 | 0.250 | 0.071 | 0.088 | 0.082 |
| 294 | b | 67 | m | 123 | 5.9   | 18.2 | 1.233696 | 1.099316 | Left      | 1.369 | 1.369 | 2.224 | 0.400 | 0.250 | 0.250 | 0.064 | 0.080 | 0.074 |
| 295 | c | 67 | m | 283 | 6     | 38.9 | 1.146299 | 0.923225 | Righ<br>t | 1.004 | 1.004 | 1.670 | 0.400 | 0.250 | 0.250 | 0.045 | 0.056 | 0.052 |
| 296 | c | 67 | m | 224 | 6.3   | 28   | 1.191644 | 0.943766 | Righ<br>t | 1.044 | 1.044 | 1.732 | 0.400 | 0.250 | 0.250 | 0.047 | 0.059 | 0.054 |
| 297 | c | 67 | m | 118 | 6.1   | 15.6 | 1.20168  | 1.066754 | Righ<br>t | 1.298 | 1.298 | 2.117 | 0.400 | 0.250 | 0.250 | 0.060 | 0.075 | 0.070 |
| 298 | c | 67 | m | 234 | 5.11  | 33.1 | 1.173014 | 1.043512 | Righ<br>t | 1.248 | 1.248 | 2.042 | 0.400 | 0.250 | 0.250 | 0.058 | 0.072 | 0.067 |
| 299 | c | 67 | m | 158 | 5.8   | 24.1 | 1.179445 | 0.943496 | Righ<br>t | 1.043 | 1.043 | 1.731 | 0.400 | 0.250 | 0.250 | 0.047 | 0.059 | 0.054 |
| 300 | c | 67 | m | 182 | 5.10. | 26.1 | 1.169193 | 0.995399 | Righ<br>t | 1.148 | 1.148 | 1.890 | 0.400 | 0.250 | 0.250 | 0.053 | 0.066 | 0.061 |

|     |   |    |   |     |       |      |          |          |           |       |       |       |       |       |       |       |       |       |
|-----|---|----|---|-----|-------|------|----------|----------|-----------|-------|-------|-------|-------|-------|-------|-------|-------|-------|
| 301 | c | 67 | m | 283 | 6     | 38.9 | 1.098649 | 0.96427  | Left      | 1.084 | 1.084 | 1.794 | 0.400 | 0.250 | 0.250 | 0.049 | 0.061 | 0.057 |
| 302 | c | 67 | m | 224 | 6.3   | 28   | 1.239294 | 1.104914 | Left      | 1.382 | 1.382 | 2.242 | 0.400 | 0.250 | 0.250 | 0.065 | 0.081 | 0.075 |
| 303 | c | 67 | m | 118 | 6.1   | 15.6 | 1.15403  | 1.01965  | Left      | 1.198 | 1.198 | 1.966 | 0.400 | 0.250 | 0.250 | 0.055 | 0.069 | 0.064 |
| 304 | c | 67 | m | 234 | 5.11  | 33.1 | 1.220664 | 1.086284 | Left      | 1.341 | 1.341 | 2.181 | 0.400 | 0.250 | 0.250 | 0.063 | 0.078 | 0.072 |
| 305 | c | 67 | m | 158 | 5.8   | 24.1 | 1.131795 | 0.997416 | Left      | 1.152 | 1.152 | 1.896 | 0.400 | 0.250 | 0.250 | 0.053 | 0.066 | 0.061 |
| 306 | c | 67 | m | 182 | 5.10. | 26.1 | 1.121543 | 0.987163 | Left      | 1.131 | 1.131 | 1.864 | 0.400 | 0.250 | 0.250 | 0.052 | 0.064 | 0.060 |
| 307 | m | 67 | m | 197 | 5.9   | 29.1 | 1.218434 | 1.012343 | Righ<br>t | 1.183 | 1.183 | 1.943 | 0.400 | 0.250 | 0.250 | 0.054 | 0.068 | 0.063 |
| 308 | m | 67 | m | 197 | 5.9   | 29.1 | 1.170784 | 1.036404 | Left      | 1.233 | 1.233 | 2.019 | 0.400 | 0.250 | 0.250 | 0.057 | 0.071 | 0.066 |
| 309 | b | 68 | m | 270 | 5.7   | 42.3 | 1.267175 | 1.063216 | Righ<br>t | 1.290 | 1.290 | 2.105 | 0.400 | 0.250 | 0.250 | 0.060 | 0.075 | 0.069 |
| 310 | b | 68 | m | 270 | 5.7   | 42.3 | 1.314825 | 1.180445 | Left      | 1.554 | 1.554 | 2.499 | 0.400 | 0.250 | 0.250 | 0.074 | 0.092 | 0.085 |
| 311 | c | 68 | m | 180 | 6.1   | 23.9 | 1.152273 | 0.914316 | Righ<br>t | 0.986 | 0.986 | 1.644 | 0.400 | 0.250 | 0.250 | 0.044 | 0.055 | 0.051 |
| 312 | c | 68 | m | 208 | 5.7   | 32.6 | 1.129227 | 0.866513 | Righ<br>t | 0.897 | 0.897 | 1.505 | 0.400 | 0.250 | 0.250 | 0.040 | 0.050 | 0.046 |
| 313 | c | 68 | m | 335 | 5.11  | 46.8 | 1.115372 | 0.889526 | Righ<br>t | 0.939 | 0.939 | 1.571 | 0.400 | 0.250 | 0.250 | 0.042 | 0.052 | 0.048 |
| 314 | c | 68 | m | 133 | 5.3   | 23.6 | 1.18139  | 0.962249 | Righ<br>t | 1.080 | 1.080 | 1.788 | 0.400 | 0.250 | 0.250 | 0.049 | 0.061 | 0.057 |
| 315 | c | 68 | m | 166 | 5.7   | 26   | 1.169557 | 1.003025 | Righ<br>t | 1.163 | 1.163 | 1.913 | 0.400 | 0.250 | 0.250 | 0.053 | 0.067 | 0.062 |
| 316 | c | 68 | m | 196 | 5.7   | 30.8 | 1.169493 | 0.948159 | Righ<br>t | 1.052 | 1.052 | 1.745 | 0.400 | 0.250 | 0.250 | 0.048 | 0.059 | 0.055 |
| 317 | c | 68 | m | 244 | 5.11  | 34.1 | 1.152473 | 1.018126 | Righ<br>t | 1.195 | 1.195 | 1.961 | 0.400 | 0.250 | 0.250 | 0.055 | 0.069 | 0.063 |
| 318 | c | 68 | m | 180 | 6.1   | 23.9 | 1.104623 | 0.970243 | Left      | 1.096 | 1.096 | 1.812 | 0.400 | 0.250 | 0.250 | 0.050 | 0.062 | 0.058 |
| 319 | c | 68 | m | 208 | 5.7   | 32.6 | 1.081577 | 0.947198 | Left      | 1.051 | 1.051 | 1.742 | 0.400 | 0.250 | 0.250 | 0.048 | 0.059 | 0.055 |
| 320 | c | 68 | m | 335 | 5.11  | 46.8 | 1.163022 | 1.028642 | Left      | 1.217 | 1.217 | 1.994 | 0.400 | 0.250 | 0.250 | 0.056 | 0.070 | 0.065 |
| 321 | c | 68 | m | 133 | 5.3   | 23.6 | 1.22904  | 1.09466  | Left      | 1.359 | 1.359 | 2.208 | 0.400 | 0.250 | 0.250 | 0.064 | 0.079 | 0.073 |
| 322 | c | 68 | m | 166 | 5.7   | 26   | 1.121907 | 0.987527 | Left      | 1.131 | 1.131 | 1.865 | 0.400 | 0.250 | 0.250 | 0.052 | 0.064 | 0.060 |
| 323 | c | 68 | m | 196 | 5.7   | 30.8 | 1.217143 | 1.082763 | Left      | 1.333 | 1.333 | 2.169 | 0.400 | 0.250 | 0.250 | 0.062 | 0.078 | 0.072 |
| 324 | c | 68 | m | 244 | 5.11  | 34.1 | 1.200123 | 1.065743 | Left      | 1.296 | 1.296 | 2.114 | 0.400 | 0.250 | 0.250 | 0.060 | 0.075 | 0.069 |
| 325 | b | 69 | m | 297 | 6.5   | 35.3 | 1.252634 | 1.139363 | Righ<br>t | 1.459 | 1.459 | 2.358 | 0.400 | 0.250 | 0.250 | 0.069 | 0.086 | 0.079 |
| 326 | b | 69 | m | 297 | 6.5   | 35.3 | 1.300284 | 1.165905 | Left      | 1.521 | 1.521 | 2.449 | 0.400 | 0.250 | 0.250 | 0.072 | 0.090 | 0.083 |
| 327 | c | 69 | m | 195 | 4     | 59.6 | 1.138134 | 0.961355 | Righ<br>t | 1.079 | 1.079 | 1.785 | 0.400 | 0.250 | 0.250 | 0.049 | 0.061 | 0.057 |
| 328 | c | 69 | m | 175 | 5.11  | 24.5 | 1.129227 | 0.964344 | Righ<br>t | 1.085 | 1.085 | 1.794 | 0.400 | 0.250 | 0.250 | 0.049 | 0.061 | 0.057 |
| 329 | c | 69 | m | 265 | 6.1   | 35   | 1.14075  | 0.937612 | Righ<br>t | 1.032 | 1.032 | 1.713 | 0.400 | 0.250 | 0.250 | 0.047 | 0.058 | 0.054 |

|     |   |    |   |     |       |      |          |          |           |       |       |       |       |       |       |       |       |       |
|-----|---|----|---|-----|-------|------|----------|----------|-----------|-------|-------|-------|-------|-------|-------|-------|-------|-------|
| 330 | c | 69 | m | 177 | 5.10. | 25.5 | 1.163796 | 0.93753  | Righ<br>t | 1.031 | 1.031 | 1.713 | 0.400 | 0.250 | 0.250 | 0.047 | 0.058 | 0.054 |
| 331 | c | 69 | m | 195 | 5.9   | 28.8 | 1.187239 | 1.038669 | Righ<br>t | 1.238 | 1.238 | 2.026 | 0.400 | 0.250 | 0.250 | 0.057 | 0.071 | 0.066 |
| 332 | c | 69 | m | 192 | 5.1   | 26.8 | 1.171862 | 0.937259 | Righ<br>t | 1.031 | 1.031 | 1.712 | 0.400 | 0.250 | 0.250 | 0.047 | 0.058 | 0.054 |
| 333 | c | 69 | m | 195 | 4     | 59.6 | 1.090484 | 0.956104 | Left      | 1.068 | 1.068 | 1.769 | 0.400 | 0.250 | 0.250 | 0.049 | 0.060 | 0.056 |
| 334 | c | 69 | m | 175 | 5.11  | 24.5 | 1.081577 | 0.947198 | Left      | 1.051 | 1.051 | 1.742 | 0.400 | 0.250 | 0.250 | 0.048 | 0.059 | 0.055 |
| 335 | c | 69 | m | 265 | 6.1   | 35   | 1.1884   | 1.05402  | Left      | 1.271 | 1.271 | 2.076 | 0.400 | 0.250 | 0.250 | 0.059 | 0.073 | 0.068 |
| 336 | c | 69 | m | 177 | 5.10. | 25.5 | 1.211446 | 1.077066 | Left      | 1.320 | 1.320 | 2.151 | 0.400 | 0.250 | 0.250 | 0.062 | 0.077 | 0.071 |
| 337 | c | 69 | m | 195 | 5.9   | 28.8 | 1.139589 | 1.005209 | Left      | 1.168 | 1.168 | 1.920 | 0.400 | 0.250 | 0.250 | 0.054 | 0.067 | 0.062 |
| 338 | c | 69 | m | 192 | 5.1   | 26.8 | 1.124212 | 0.989832 | Left      | 1.136 | 1.136 | 1.872 | 0.400 | 0.250 | 0.250 | 0.052 | 0.065 | 0.060 |
| 339 | b | 70 | m | 190 | 6.1   | 25.1 | 1.239388 | 1.001587 | Righ<br>t | 1.160 | 1.160 | 1.909 | 0.400 | 0.250 | 0.250 | 0.053 | 0.066 | 0.061 |
| 340 | b | 70 | m | 190 | 6.1   | 25.1 | 1.191738 | 1.057359 | Left      | 1.278 | 1.278 | 2.086 | 0.400 | 0.250 | 0.250 | 0.059 | 0.074 | 0.068 |
| 341 | c | 71 | m | 203 | 5.8   | 31.4 | 1.126753 | 0.973633 | Righ<br>t | 1.103 | 1.103 | 1.822 | 0.400 | 0.250 | 0.250 | 0.050 | 0.063 | 0.058 |
| 342 | c | 71 | m | 218 | 5.9   | 32.2 | 1.155206 | 1.027043 | Righ<br>t | 1.213 | 1.213 | 1.989 | 0.400 | 0.250 | 0.250 | 0.056 | 0.070 | 0.065 |
| 343 | c | 71 | m | 262 | 6.8   | 28.8 | 1.137134 | 0.888631 | Righ<br>t | 0.938 | 0.938 | 1.569 | 0.400 | 0.250 | 0.250 | 0.042 | 0.052 | 0.048 |
| 344 | c | 71 | m | 208 | 5.11  | 29.1 | 1.151273 | 0.913516 | Righ<br>t | 0.985 | 0.985 | 1.642 | 0.400 | 0.250 | 0.250 | 0.044 | 0.055 | 0.051 |
| 345 | c | 71 | m | 267 | 5.11  | 37.2 | 1.138634 | 1.009163 | Righ<br>t | 1.176 | 1.176 | 1.933 | 0.400 | 0.250 | 0.250 | 0.054 | 0.067 | 0.062 |
| 346 | c | 71 | m | 203 | 5.8   | 31.4 | 1.079103 | 0.944723 | Left      | 1.046 | 1.046 | 1.734 | 0.400 | 0.250 | 0.250 | 0.047 | 0.059 | 0.055 |
| 347 | c | 71 | m | 218 | 5.9   | 32.2 | 1.107556 | 0.973176 | Left      | 1.102 | 1.102 | 1.821 | 0.400 | 0.250 | 0.250 | 0.050 | 0.063 | 0.058 |
| 348 | c | 71 | m | 262 | 6.8   | 28.8 | 1.184784 | 1.050404 | Left      | 1.263 | 1.263 | 2.064 | 0.400 | 0.250 | 0.250 | 0.059 | 0.073 | 0.068 |
| 349 | c | 71 | m | 208 | 5.11  | 29.1 | 1.198923 | 1.064543 | Left      | 1.293 | 1.293 | 2.110 | 0.400 | 0.250 | 0.250 | 0.060 | 0.075 | 0.069 |
| 350 | c | 71 | m | 267 | 5.11  | 37.2 | 1.090984 | 0.956604 | Left      | 1.069 | 1.069 | 1.770 | 0.400 | 0.250 | 0.250 | 0.049 | 0.061 | 0.056 |
| 351 | c | 72 | m | 239 | 5.10. | 34.4 | 1.10947  | 0.869536 | Righ<br>t | 0.902 | 0.902 | 1.514 | 0.400 | 0.250 | 0.250 | 0.040 | 0.050 | 0.046 |
| 352 | c | 72 | m | 238 | 6     | 32.4 | 1.149516 | 0.965033 | Righ<br>t | 1.086 | 1.086 | 1.796 | 0.400 | 0.250 | 0.250 | 0.049 | 0.062 | 0.057 |
| 353 | c | 72 | m | 178 | 5.7   | 28   | 1.139728 | 0.930023 | Righ<br>t | 1.017 | 1.017 | 1.690 | 0.400 | 0.250 | 0.250 | 0.046 | 0.057 | 0.053 |
| 354 | c | 72 | m | 239 | 5.10. | 34.4 | 1.06182  | 0.92744  | Left      | 1.012 | 1.012 | 1.683 | 0.400 | 0.250 | 0.250 | 0.046 | 0.057 | 0.053 |
| 355 | c | 72 | m | 238 | 6     | 32.4 | 1.197166 | 1.062786 | Left      | 1.289 | 1.289 | 2.104 | 0.400 | 0.250 | 0.250 | 0.060 | 0.075 | 0.069 |
| 356 | c | 72 | m | 178 | 5.7   | 28   | 1.092078 | 0.957698 | Left      | 1.071 | 1.071 | 1.774 | 0.400 | 0.250 | 0.250 | 0.049 | 0.061 | 0.056 |
| 357 | b | 73 | m | 216 | 6.3   | 27   | 1.224293 | 0.988716 | Righ<br>t | 1.134 | 1.134 | 1.869 | 0.400 | 0.250 | 0.250 | 0.052 | 0.065 | 0.060 |
| 358 | b | 73 | m | 216 | 6.3   | 27   | 1.176643 | 1.042263 | Left      | 1.245 | 1.245 | 2.038 | 0.400 | 0.250 | 0.250 | 0.058 | 0.072 | 0.066 |

|     |   |    |   |     |       |      |          |          |           |       |       |       |       |       |       |       |       |       |
|-----|---|----|---|-----|-------|------|----------|----------|-----------|-------|-------|-------|-------|-------|-------|-------|-------|-------|
| 359 | c | 73 | m | 152 | 5.9   | 22.6 | 1.120677 | 0.880516 | Righ<br>t | 0.922 | 0.922 | 1.545 | 0.400 | 0.250 | 0.250 | 0.041 | 0.051 | 0.047 |
| 360 | c | 73 | m | 190 | 5.7   | 29.9 | 1.098263 | 0.84088  | Righ<br>t | 0.850 | 0.850 | 1.433 | 0.400 | 0.250 | 0.250 | 0.038 | 0.047 | 0.043 |
| 361 | c | 73 | m | 218 | 5.7   | 34.1 | 1.098263 | 0.853667 | Righ<br>t | 0.873 | 0.873 | 1.469 | 0.400 | 0.250 | 0.250 | 0.039 | 0.048 | 0.045 |
| 362 | c | 73 | m | 228 | 6     | 30.9 | 1.098263 | 0.862296 | Righ<br>t | 0.889 | 0.889 | 1.493 | 0.400 | 0.250 | 0.250 | 0.039 | 0.049 | 0.045 |
| 363 | c | 73 | m | 229 | 5.11  | 31.9 | 1.131884 | 0.908538 | Righ<br>t | 0.975 | 0.975 | 1.627 | 0.400 | 0.250 | 0.250 | 0.044 | 0.055 | 0.051 |
| 364 | c | 73 | m | 180 | 5.9   | 26.6 | 1.123375 | 0.887798 | Righ<br>t | 0.936 | 0.936 | 1.566 | 0.400 | 0.250 | 0.250 | 0.042 | 0.052 | 0.048 |
| 365 | c | 73 | m | 201 | 5.10. | 29.3 | 1.137487 | 0.932969 | Righ<br>t | 1.023 | 1.023 | 1.699 | 0.400 | 0.250 | 0.250 | 0.046 | 0.058 | 0.053 |
| 366 | c | 73 | m | 152 | 5.9   | 22.6 | 1.168327 | 1.033947 | Left      | 1.228 | 1.228 | 2.011 | 0.400 | 0.250 | 0.250 | 0.057 | 0.071 | 0.065 |
| 367 | c | 73 | m | 190 | 5.7   | 29.9 | 1.050613 | 0.916233 | Left      | 0.990 | 0.990 | 1.650 | 0.400 | 0.250 | 0.250 | 0.045 | 0.056 | 0.051 |
| 368 | c | 73 | m | 218 | 5.7   | 34.1 | 1.050613 | 0.916233 | Left      | 0.990 | 0.990 | 1.650 | 0.400 | 0.250 | 0.250 | 0.045 | 0.056 | 0.051 |
| 369 | c | 73 | m | 228 | 6     | 30.9 | 1.050613 | 0.916233 | Left      | 0.990 | 0.990 | 1.650 | 0.400 | 0.250 | 0.250 | 0.045 | 0.056 | 0.051 |
| 370 | c | 73 | m | 229 | 5.11  | 31.9 | 1.179534 | 1.045154 | Left      | 1.252 | 1.252 | 2.047 | 0.400 | 0.250 | 0.250 | 0.058 | 0.072 | 0.067 |
| 371 | c | 73 | m | 180 | 5.9   | 26.6 | 1.075725 | 0.941345 | Left      | 1.039 | 1.039 | 1.724 | 0.400 | 0.250 | 0.250 | 0.047 | 0.059 | 0.054 |
| 372 | c | 73 | m | 201 | 5.10. | 29.3 | 1.089837 | 0.955457 | Left      | 1.067 | 1.067 | 1.767 | 0.400 | 0.250 | 0.250 | 0.048 | 0.060 | 0.056 |
| 373 | c | 74 | m | 194 | 5.8   | 29.5 | 1.084638 | 0.946096 | Righ<br>t | 1.048 | 1.048 | 1.739 | 0.400 | 0.250 | 0.250 | 0.048 | 0.059 | 0.055 |
| 374 | c | 74 | m | 196 | 5.6   | 31.6 | 1.095705 | 0.847469 | Righ<br>t | 0.862 | 0.862 | 1.451 | 0.400 | 0.250 | 0.250 | 0.038 | 0.047 | 0.044 |
| 375 | c | 74 | m | 267 | 5.11  | 37.4 | 1.106673 | 0.876419 | Righ<br>t | 0.915 | 0.915 | 1.534 | 0.400 | 0.250 | 0.250 | 0.041 | 0.051 | 0.047 |
| 376 | c | 74 | m | 194 | 5.8   | 29.5 | 1.132288 | 0.997908 | Left      | 1.153 | 1.153 | 1.897 | 0.400 | 0.250 | 0.250 | 0.053 | 0.066 | 0.061 |
| 377 | c | 74 | m | 196 | 5.6   | 31.6 | 1.048055 | 0.913676 | Left      | 0.985 | 0.985 | 1.642 | 0.400 | 0.250 | 0.250 | 0.044 | 0.055 | 0.051 |
| 378 | c | 74 | m | 267 | 5.11  | 37.4 | 1.059023 | 0.924643 | Left      | 1.006 | 1.006 | 1.674 | 0.400 | 0.250 | 0.250 | 0.045 | 0.057 | 0.052 |
| 379 | c | 75 | m | 190 | 5.10. | 27.3 | 1.117841 | 0.987062 | Righ<br>t | 1.130 | 1.130 | 1.864 | 0.400 | 0.250 | 0.250 | 0.052 | 0.064 | 0.060 |
| 380 | c | 75 | m | 191 | 5.8   | 29.1 | 1.100313 | 0.975586 | Righ<br>t | 1.107 | 1.107 | 1.828 | 0.400 | 0.250 | 0.250 | 0.051 | 0.063 | 0.058 |
| 381 | c | 75 | m | 190 | 5.10. | 27.3 | 1.165491 | 1.031111 | Left      | 1.222 | 1.222 | 2.002 | 0.400 | 0.250 | 0.250 | 0.056 | 0.070 | 0.065 |
| 382 | c | 75 | m | 191 | 5.8   | 29.1 | 1.052663 | 0.918283 | Left      | 0.994 | 0.994 | 1.656 | 0.400 | 0.250 | 0.250 | 0.045 | 0.056 | 0.052 |
| 383 | c | 76 | m | 140 | 5.2   | 25.6 | 1.094892 | 0.897404 | Righ<br>t | 0.954 | 0.954 | 1.594 | 0.400 | 0.250 | 0.250 | 0.043 | 0.053 | 0.049 |
| 384 | c | 76 | m | 109 | 5.8   | 16.6 | 1.101071 | 0.903426 | Righ<br>t | 0.966 | 0.966 | 1.612 | 0.400 | 0.250 | 0.250 | 0.043 | 0.054 | 0.050 |
| 385 | c | 76 | m | 140 | 5.2   | 25.6 | 1.047242 | 0.912863 | Left      | 0.984 | 0.984 | 1.640 | 0.400 | 0.250 | 0.250 | 0.044 | 0.055 | 0.051 |
| 386 | c | 76 | m | 109 | 5.8   | 16.6 | 1.053421 | 0.919042 | Left      | 0.996 | 0.996 | 1.658 | 0.400 | 0.250 | 0.250 | 0.045 | 0.056 | 0.052 |

|     |    |    |   |     |       |      |          |          |           |       |       |       |       |       |       |       |       |       |
|-----|----|----|---|-----|-------|------|----------|----------|-----------|-------|-------|-------|-------|-------|-------|-------|-------|-------|
| 387 | b  | 77 | m | 190 | 6.2   | 24.4 | 1.190958 | 0.993952 | Righ<br>t | 1.145 | 1.145 | 1.885 | 0.400 | 0.250 | 0.250 | 0.052 | 0.065 | 0.060 |
| 388 | b  | 77 | m | 190 | 6.2   | 24.4 | 1.143308 | 1.008928 | Left      | 1.175 | 1.175 | 1.932 | 0.400 | 0.250 | 0.250 | 0.054 | 0.067 | 0.062 |
| 389 | c  | 77 | m | 183 | 5.10. | 26.3 | 1.084052 | 0.878947 | Righ<br>t | 0.920 | 0.920 | 1.541 | 0.400 | 0.250 | 0.250 | 0.041 | 0.051 | 0.047 |
| 390 | c  | 77 | m | 199 | 5.11  | 27.8 | 1.05912  | 0.804058 | Righ<br>t | 0.785 | 0.785 | 1.331 | 0.400 | 0.250 | 0.250 | 0.034 | 0.043 | 0.040 |
| 391 | c  | 77 | m | 175 | 5.7   | 27.4 | 1.036421 | 0.791589 | Righ<br>t | 0.763 | 0.763 | 1.298 | 0.400 | 0.250 | 0.250 | 0.033 | 0.041 | 0.038 |
| 392 | c  | 77 | m | 191 | 5.6   | 30.8 | 1.062371 | 0.889127 | Righ<br>t | 0.939 | 0.939 | 1.570 | 0.400 | 0.250 | 0.250 | 0.042 | 0.052 | 0.048 |
| 393 | c  | 77 | m | 164 | 5.6   | 22.6 | 1.073211 | 0.870024 | Righ<br>t | 0.903 | 0.903 | 1.515 | 0.400 | 0.250 | 0.250 | 0.040 | 0.050 | 0.046 |
| 394 | c  | 77 | m | 183 | 5.10. | 26.3 | 1.131702 | 0.997322 | Left      | 1.151 | 1.151 | 1.896 | 0.400 | 0.250 | 0.250 | 0.053 | 0.066 | 0.061 |
| 395 | c  | 77 | m | 199 | 5.11  | 27.8 | 1.10677  | 0.97239  | Left      | 1.101 | 1.101 | 1.819 | 0.400 | 0.250 | 0.250 | 0.050 | 0.063 | 0.058 |
| 396 | c  | 77 | m | 175 | 5.7   | 27.4 | 1.084071 | 0.949691 | Left      | 1.055 | 1.055 | 1.749 | 0.400 | 0.250 | 0.250 | 0.048 | 0.060 | 0.055 |
| 397 | c  | 77 | m | 191 | 5.6   | 30.8 | 1.014721 | 0.880341 | Left      | 0.922 | 0.922 | 1.545 | 0.400 | 0.250 | 0.250 | 0.041 | 0.051 | 0.047 |
| 398 | c  | 77 | m | 164 | 5.6   | 22.6 | 1.025561 | 0.891181 | Left      | 0.942 | 0.942 | 1.576 | 0.400 | 0.250 | 0.250 | 0.042 | 0.053 | 0.049 |
| 399 | c  | 78 | m | 118 | 5.5   | 19.6 | 1.037937 | 0.825624 | Righ<br>t | 0.823 | 0.823 | 1.391 | 0.400 | 0.250 | 0.250 | 0.036 | 0.045 | 0.042 |
| 400 | c  | 78 | m | 118 | 5.5   | 19.6 | 1.085587 | 0.951207 | Left      | 1.058 | 1.058 | 1.754 | 0.400 | 0.250 | 0.250 | 0.048 | 0.060 | 0.055 |
| 401 | c  | 79 | m | 218 | 6.1   | 28.8 | 1.037937 | 0.837469 | Righ<br>t | 0.844 | 0.844 | 1.423 | 0.400 | 0.250 | 0.250 | 0.037 | 0.046 | 0.043 |
| 402 | c  | 79 | m | 218 | 6.1   | 28.8 | 1.085587 | 0.951207 | Left      | 1.058 | 1.058 | 1.754 | 0.400 | 0.250 | 0.250 | 0.048 | 0.060 | 0.055 |
| 403 | c  | 80 | m | 208 | 5.10. | 29.9 | 1.026056 | 0.794807 | Righ<br>t | 0.769 | 0.769 | 1.306 | 0.400 | 0.250 | 0.250 | 0.034 | 0.042 | 0.039 |
| 404 | c  | 80 | m | 208 | 5.10. | 29.9 | 1.073706 | 0.939327 | Left      | 1.035 | 1.035 | 1.718 | 0.400 | 0.250 | 0.250 | 0.047 | 0.058 | 0.054 |
| 405 | c  | 81 | m | 166 | 6     | 22.5 | 1.015692 | 0.789315 | Righ<br>t | 0.759 | 0.759 | 1.292 | 0.400 | 0.250 | 0.250 | 0.033 | 0.041 | 0.038 |
| 406 | c  | 81 | m | 225 | 6     | 30.5 | 1.002339 | 0.867971 | Righ<br>t | 0.899 | 0.899 | 1.509 | 0.400 | 0.250 | 0.250 | 0.040 | 0.050 | 0.046 |
| 407 | c  | 81 | m | 201 | 5.6   | 32.6 | 1.022589 | 0.797914 | Righ<br>t | 0.774 | 0.774 | 1.315 | 0.400 | 0.250 | 0.250 | 0.034 | 0.042 | 0.039 |
| 408 | c  | 81 | m | 166 | 6     | 22.5 | 0.968042 | 0.833662 | Left      | 0.837 | 0.837 | 1.413 | 0.400 | 0.250 | 0.250 | 0.037 | 0.046 | 0.043 |
| 409 | c  | 81 | m | 225 | 6     | 30.5 | 0.954689 | 0.82031  | Left      | 0.813 | 0.813 | 1.376 | 0.400 | 0.250 | 0.250 | 0.036 | 0.044 | 0.041 |
| 410 | c  | 81 | m | 201 | 5.6   | 32.6 | 1.070239 | 0.935859 | Left      | 1.028 | 1.028 | 1.708 | 0.400 | 0.250 | 0.250 | 0.047 | 0.058 | 0.054 |
| 411 | ai | 82 | m | 153 | 5.6   | 25.1 | 0.911218 | 0.673302 | Righ<br>t | 0.572 | 0.572 | 0.995 | 0.400 | 0.250 | 0.250 | 0.024 | 0.030 | 0.028 |
| 412 | ai | 82 | m | 153 | 5.6   | 25.1 | 0.863568 | 0.729188 | Left      | 0.659 | 0.659 | 1.134 | 0.400 | 0.250 | 0.250 | 0.028 | 0.035 | 0.033 |
| 413 | c  | 82 | m | 205 | 5.6   | 33.1 | 1.012464 | 0.769169 | Righ<br>t | 0.725 | 0.725 | 1.238 | 0.400 | 0.250 | 0.250 | 0.031 | 0.039 | 0.036 |

|     |   |    |   |     |       |      |          |          |           |       |       |       |       |       |       |       |       |       |
|-----|---|----|---|-----|-------|------|----------|----------|-----------|-------|-------|-------|-------|-------|-------|-------|-------|-------|
| 414 | c | 82 | m | 160 | 5.10. | 23.1 | 0.992215 | 0.837692 | Righ<br>t | 0.844 | 0.844 | 1.424 | 0.400 | 0.250 | 0.250 | 0.037 | 0.046 | 0.043 |
| 415 | c | 82 | m | 205 | 5.6   | 33.1 | 0.964814 | 0.830434 | Left      | 0.831 | 0.831 | 1.404 | 0.400 | 0.250 | 0.250 | 0.037 | 0.046 | 0.042 |
| 416 | c | 82 | m | 160 | 5.10. | 23.1 | 1.039865 | 0.905485 | Left      | 0.970 | 0.970 | 1.618 | 0.400 | 0.250 | 0.250 | 0.044 | 0.054 | 0.050 |
| 417 | c | 84 | m | 233 | 5.6   | 37.6 | 0.986234 | 0.868067 | Righ<br>t | 0.899 | 0.899 | 1.510 | 0.400 | 0.250 | 0.250 | 0.040 | 0.050 | 0.046 |
| 418 | c | 84 | m | 195 | 5.7   | 30.6 | 0.966509 | 0.8357   | Righ<br>t | 0.841 | 0.841 | 1.418 | 0.400 | 0.250 | 0.250 | 0.037 | 0.046 | 0.043 |
| 419 | c | 84 | m | 188 | 5.7   | 29.6 | 0.996096 | 0.757667 | Righ<br>t | 0.706 | 0.706 | 1.208 | 0.400 | 0.250 | 0.250 | 0.030 | 0.038 | 0.035 |
| 420 | c | 84 | m | 233 | 5.6   | 37.6 | 0.938584 | 0.804204 | Left      | 0.785 | 0.785 | 1.332 | 0.400 | 0.250 | 0.250 | 0.034 | 0.043 | 0.040 |
| 421 | c | 84 | m | 195 | 5.7   | 30.6 | 0.918859 | 0.784479 | Left      | 0.751 | 0.751 | 1.279 | 0.400 | 0.250 | 0.250 | 0.033 | 0.041 | 0.038 |
| 422 | c | 84 | m | 188 | 5.7   | 29.6 | 0.948446 | 0.814066 | Left      | 0.802 | 0.802 | 1.359 | 0.400 | 0.250 | 0.250 | 0.035 | 0.044 | 0.041 |
| 423 | b | 87 | m | 149 | 6.1   | 19.7 | 1.111095 | 0.952046 | Righ<br>t | 1.060 | 1.060 | 1.757 | 0.400 | 0.250 | 0.250 | 0.048 | 0.060 | 0.055 |
| 424 | b | 87 | m | 149 | 6.1   | 19.7 | 1.158745 | 1.024365 | Left      | 1.208 | 1.208 | 1.981 | 0.400 | 0.250 | 0.250 | 0.056 | 0.069 | 0.064 |
| 425 | c | 87 | m | 149 | 5.10. | 21.4 | 1.009846 | 0.755526 | Righ<br>t | 0.702 | 0.702 | 1.202 | 0.400 | 0.250 | 0.250 | 0.030 | 0.038 | 0.035 |
| 426 | c | 87 | m | 149 | 5.10. | 21.4 | 0.962196 | 0.827816 | Left      | 0.827 | 0.827 | 1.397 | 0.400 | 0.250 | 0.250 | 0.036 | 0.045 | 0.042 |
| 427 | c | 88 | m | 164 | 5.3   | 29.1 | 1.030455 | 0.831236 | Righ<br>t | 0.833 | 0.833 | 1.406 | 0.400 | 0.250 | 0.250 | 0.037 | 0.046 | 0.042 |
| 428 | c | 88 | m | 164 | 5.3   | 29.1 | 1.078105 | 0.943725 | Left      | 1.044 | 1.044 | 1.731 | 0.400 | 0.250 | 0.250 | 0.047 | 0.059 | 0.054 |
| 429 | b | 89 | m | 112 | 5.11  | 15.8 | 1.106327 | 0.978134 | Righ<br>t | 1.112 | 1.112 | 1.836 | 0.400 | 0.250 | 0.250 | 0.051 | 0.063 | 0.059 |
| 430 | b | 89 | m | 112 | 5.11  | 15.8 | 1.153977 | 1.019597 | Left      | 1.198 | 1.198 | 1.966 | 0.400 | 0.250 | 0.250 | 0.055 | 0.069 | 0.064 |
| 431 | c | 89 | m | 209 | 5.8   | 32.4 | 0.999036 | 0.761588 | Righ<br>t | 0.713 | 0.713 | 1.218 | 0.400 | 0.250 | 0.250 | 0.031 | 0.038 | 0.035 |
| 432 | c | 89 | m | 209 | 5.8   | 32.4 | 1.046686 | 0.912306 | Left      | 0.983 | 0.983 | 1.638 | 0.400 | 0.250 | 0.250 | 0.044 | 0.055 | 0.051 |
| 433 | c | 90 | m | 123 | 5.6   | 19.9 | 1.019424 | 0.82815  | Righ<br>t | 0.827 | 0.827 | 1.398 | 0.400 | 0.250 | 0.250 | 0.036 | 0.045 | 0.042 |
| 434 | c | 90 | m | 123 | 5.6   | 19.9 | 1.067074 | 0.932694 | Left      | 1.022 | 1.022 | 1.698 | 0.400 | 0.250 | 0.250 | 0.046 | 0.058 | 0.053 |
| 435 | c | 91 | m | 175 | 6     | 23.8 | 0.988225 | 0.752456 | Righ<br>t | 0.697 | 0.697 | 1.194 | 0.400 | 0.250 | 0.250 | 0.030 | 0.037 | 0.035 |
| 436 | c | 91 | m | 175 | 6     | 23.8 | 1.035875 | 0.901496 | Left      | 0.962 | 0.962 | 1.606 | 0.400 | 0.250 | 0.250 | 0.043 | 0.054 | 0.050 |
| 437 | c | 92 | m | 175 | 5.4   | 30   | 1.008393 | 0.84065  | Righ<br>t | 0.849 | 0.849 | 1.432 | 0.400 | 0.250 | 0.250 | 0.038 | 0.047 | 0.043 |
| 438 | c | 92 | m | 175 | 5.4   | 30   | 0.960743 | 0.826364 | Left      | 0.824 | 0.824 | 1.393 | 0.400 | 0.250 | 0.250 | 0.036 | 0.045 | 0.042 |



## Supplementary materials B

### The Statistical Analysis

#### Bivariate Fit of Density by Age

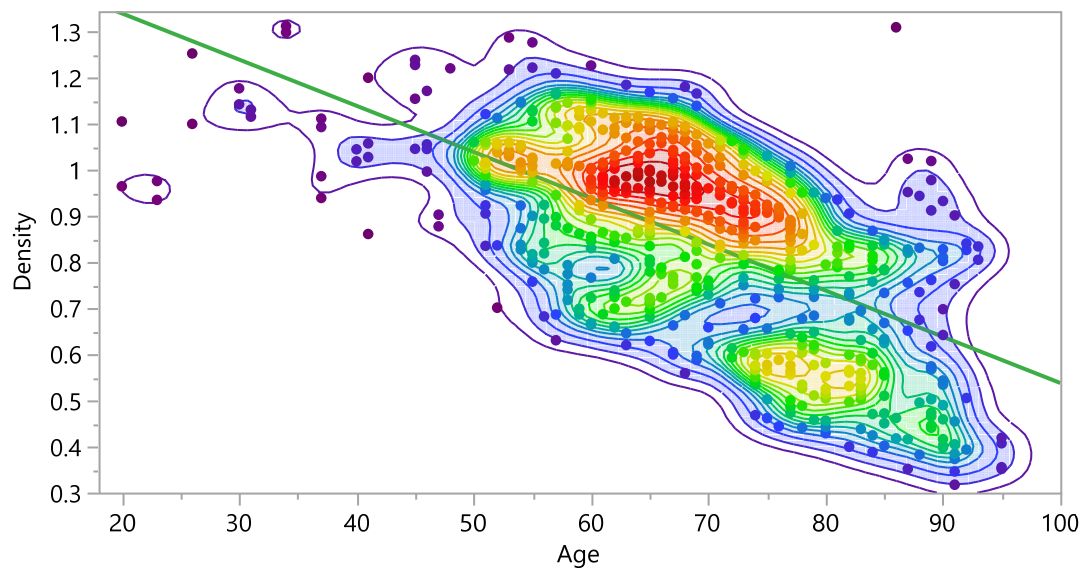

.1 .2 .3 .4 .5 .6 .7 .8 .9 Quantile Density Contours  
— Linear Fit

#### Summary Statistics

|            | Value    | Lower 95% | Upper 95% | Signif. Prob |
|------------|----------|-----------|-----------|--------------|
| Correlatio | -0.62399 | -0.67004  | -0.57317  | <.0001*      |
| n          |          |           |           |              |
| Covarianc  | -1.76426 |           |           |              |
| e          |          |           |           |              |
| Count      | 614      |           |           |              |

| Variable | Mean     | Std Dev |
|----------|----------|---------|
| Age      | 68.71987 | 13.266  |

| Variable | Mean     | Std Dev  |
|----------|----------|----------|
| Density  | 0.851499 | 0.213129 |

### Quantile Density Contours

| Variable | Kernel Std |
|----------|------------|
| Age      | 2.275177   |
| Density  | 0.036553   |

### Linear Fit

Density = 1.5404122 - 0.010025\*Age

### Summary of Fit

|                            |          |
|----------------------------|----------|
| RSquare                    | 0.389366 |
| RSquare Adj                | 0.388369 |
| Root Mean Square Error     | 0.166682 |
| Mean of Response           | 0.851499 |
| Observations (or Sum Wgts) | 614      |

### Analysis of Variance

| Source   | DF  | Sum of Squares | Mean Square | F Ratio            |
|----------|-----|----------------|-------------|--------------------|
| Model    | 1   | 10.841885      | 10.8419     | 390.2376           |
| Error    | 612 | 17.003059      | 0.0278      | <b>Prob &gt; F</b> |
| C. Total | 613 | 27.844944      |             | <.0001*            |

## Parameter Estimates

| Term      | Estimate  | Std Error | t Ratio | Prob> t |
|-----------|-----------|-----------|---------|---------|
| Intercept | 1.5404122 | 0.035517  | 43.37   | <.0001* |
| Age       | -0.010025 | 0.000507  | -19.75  | <.0001* |

## Diagnostics Plots

### Residual by Predicted Plot

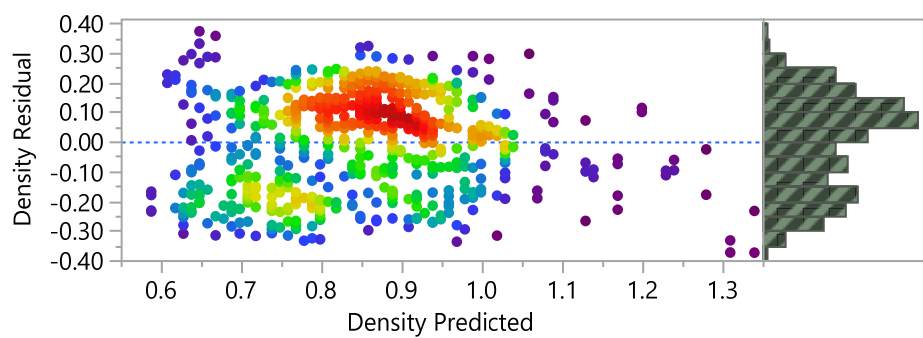

### Actual by Predicted Plot

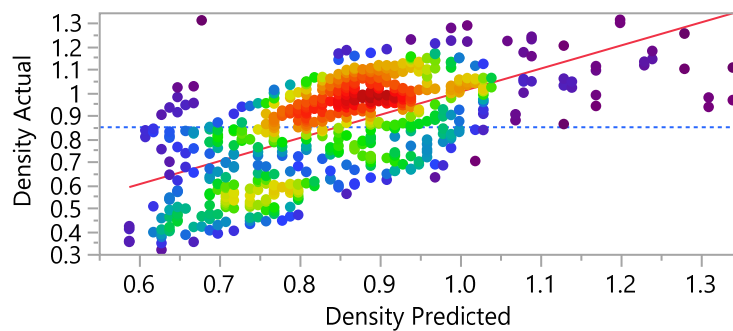

**Residual by Row Plot**

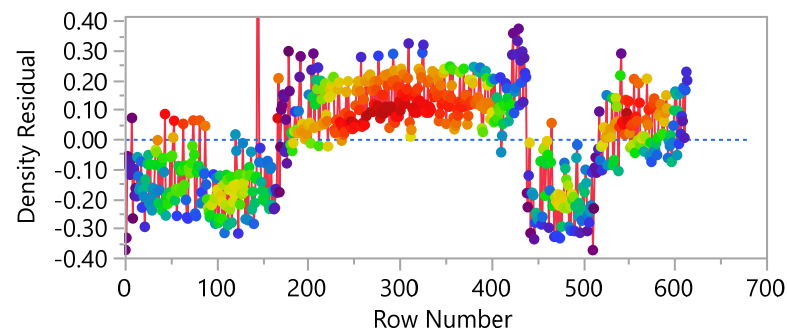

**Residual by X Plot**

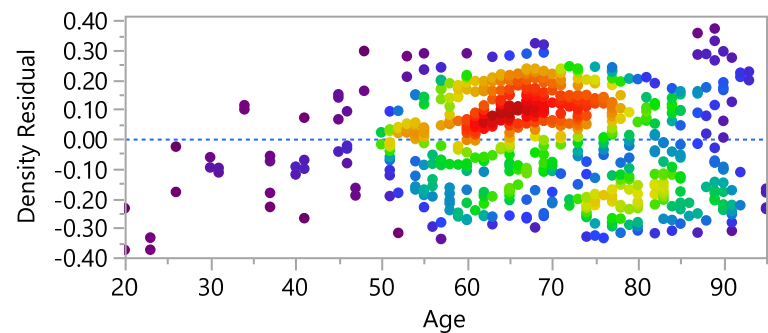

**Residual Normal Quantile Plot**

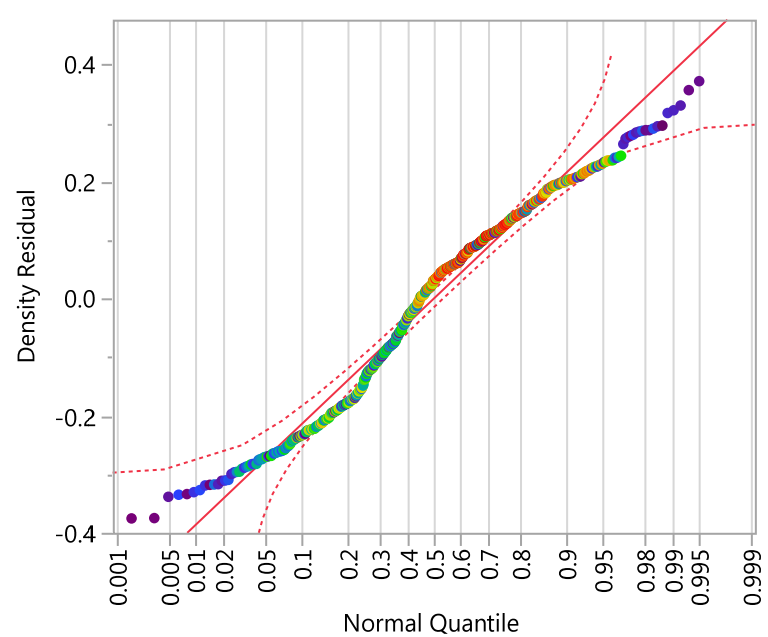

## Oneway Analysis of Density By Gender

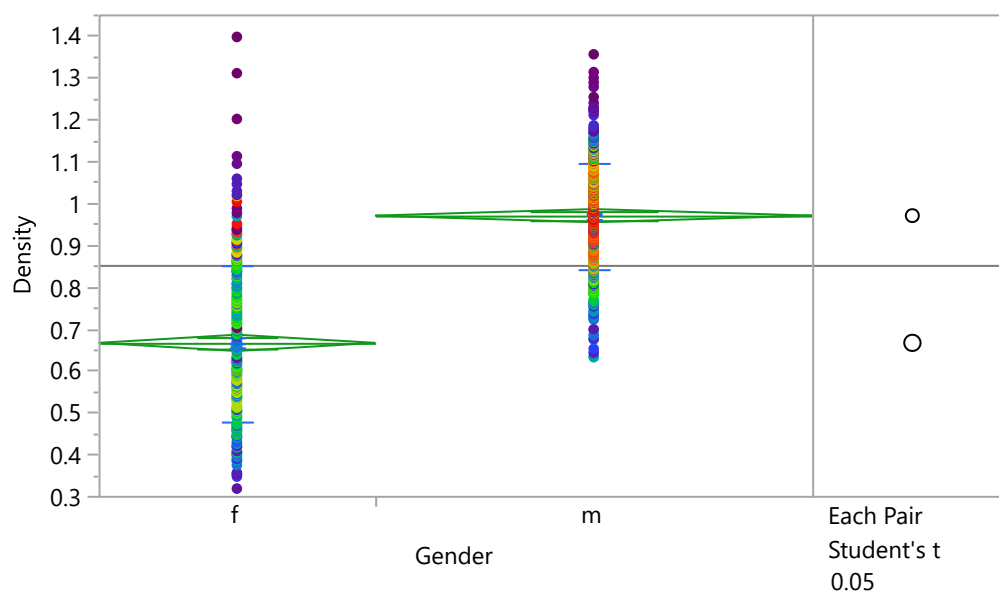

## Oneway Anova

### Summary of Fit

|                            |          |
|----------------------------|----------|
| Rsquare                    | 0.483592 |
| Adj Rsquare                | 0.482748 |
| Root Mean Square Error     | 0.153283 |
| Mean of Response           | 0.851499 |
| Observations (or Sum Wgts) | 614      |

### Pooled t Test

m-f

Assuming equal variances

|             |          |         |          |
|-------------|----------|---------|----------|
| Difference  | 0.303959 | t Ratio | 23.93969 |
| Std Err Dif | 0.012697 | DF      | 612      |

Upper CL 0.328893 Prob > <.0001\*

Dif |t|

Lower CL 0.279024 Prob > t <.0001\*

Dif

Confidence 0.95 Prob < t 1.0000

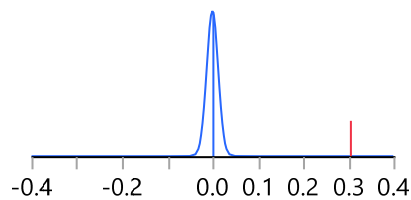

### Analysis of Variance

| Source   | DF  | Sum of Squares | Mean Square | F Ratio  | Prob > F |
|----------|-----|----------------|-------------|----------|----------|
| Gender   | 1   | 13.465586      | 13.4656     | 573.1090 | <.0001*  |
| Error    | 612 | 14.379358      | 0.0235      |          |          |
| C. Total | 613 | 27.844944      |             |          |          |

### Means for Oneway Anova

| Level | Number | Mean     | Std Error | Lower 95% | Upper 95% |
|-------|--------|----------|-----------|-----------|-----------|
| f     | 238    | 0.665361 | 0.00994   | 0.64585   | 0.68487   |
| m     | 376    | 0.969320 | 0.00790   | 0.95380   | 0.98484   |

Std Error uses a pooled estimate of error variance

### Means and Std Deviations

| Level | Number | Mean      | Std Dev   | Std Err   | Lower 95% | Upper 95% |
|-------|--------|-----------|-----------|-----------|-----------|-----------|
| Mean  |        |           |           |           |           |           |
| f     | 238    | 0.6653613 | 0.187628  | 0.0121621 | 0.6414017 | 0.689321  |
| m     | 376    | 0.9693199 | 0.1268695 | 0.0065428 | 0.9564548 | 0.9821851 |

### t Test

m-f

Assuming unequal variances

|             |          |          |          |
|-------------|----------|----------|----------|
| Difference  | 0.303959 | t Ratio  | 22.00951 |
| Std Err Dif | 0.013810 | DF       | 374.22   |
| Upper CL    | 0.331114 | Prob >   | <.0001*  |
| Dif         |          | t        |          |
| Lower CL    | 0.276803 | Prob > t | <.0001*  |
| Dif         |          |          |          |
| Confidence  | 0.95     | Prob < t | 1.0000   |

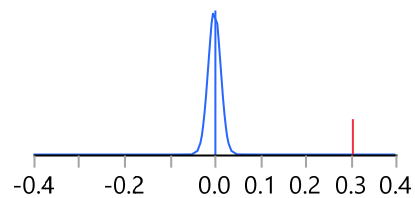

**CDF Plot**

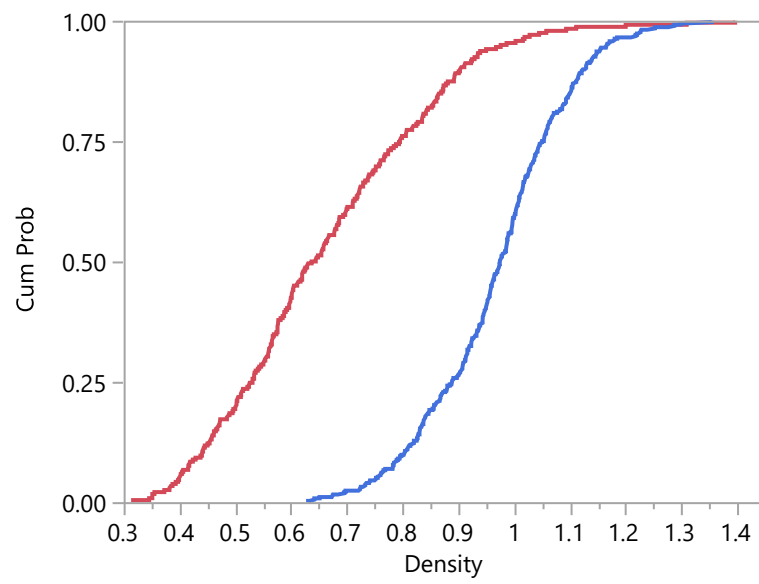

— f  
— m

**Compare Densities**

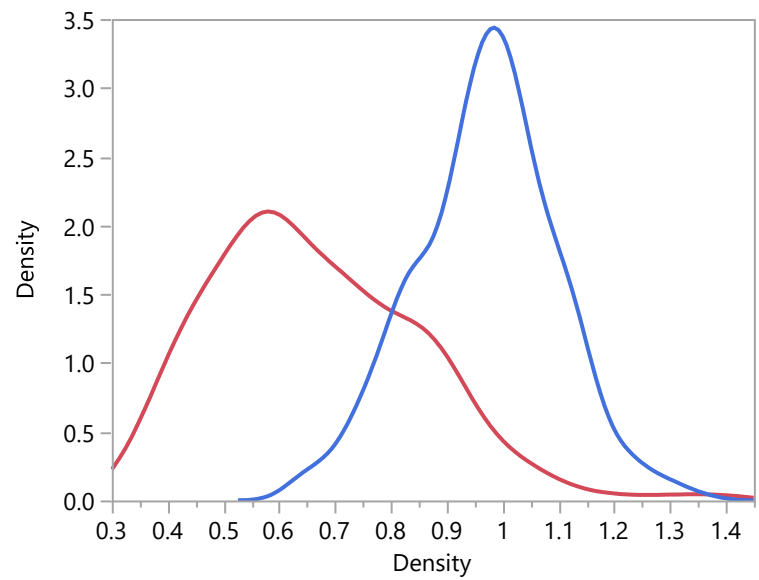

— f  
— m



Composition of Densities

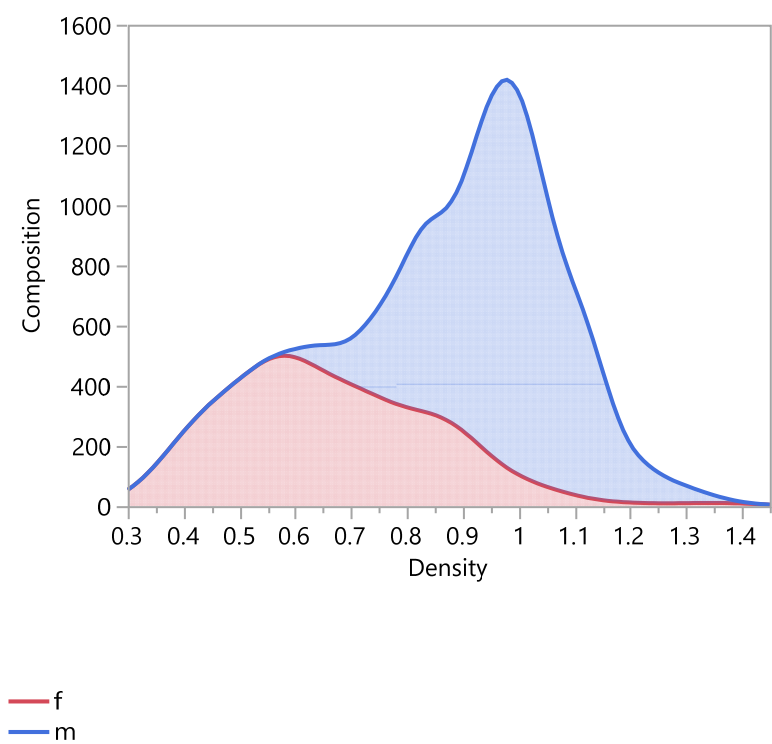

Means Comparisons

Comparisons for each pair using Student's t

Confidence Quantile

| t       | Alpha |
|---------|-------|
| 1.96385 | 0.05  |

Difference Matrix

Dif=Mean[i]-Mean[j]

|   | m        | f       |
|---|----------|---------|
| m | 0.00000  | 0.30396 |
| f | -0.30396 | 0.00000 |

## LSD Threshold Matrix

Abs(Dif)-LSD

|   | m        | f        |
|---|----------|----------|
| m | -0.02195 | 0.27902  |
| f | 0.27902  | -0.02759 |

Positive values show pairs of means that are significantly different.

## Connecting Letters Report

| Level |   | Mean       |
|-------|---|------------|
| m     | A | 0.96931993 |
| f     | B | 0.66536134 |

Levels not connected by same letter are significantly different.

## Ordered Differences Report

| Level | - Level | Difference | Std Err Dif | Lower CL  | Upper CL  | p-Value |
|-------|---------|------------|-------------|-----------|-----------|---------|
| m     | f       | 0.3039586  | 0.0126968   | 0.2790239 | 0.3288933 | <.0001* |

## Detailed Comparisons Report

### Comparing m with f

|             |          |          |          |
|-------------|----------|----------|----------|
| Difference  | 0.303959 | t Ratio  | 23.93969 |
| Std Err Dif | 0.012697 | DF       | 612      |
| Upper CL    | 0.328893 | Prob >   | <.0001*  |
| Dif         |          | t        |          |
| Lower CL    | 0.279024 | Prob > t | <.0001*  |
| Dif         |          |          |          |

Confidence 0.95 Prob < t 1.0000

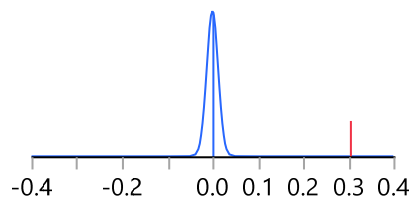

Missing Rows62

### Oneway Analysis of Density By Race

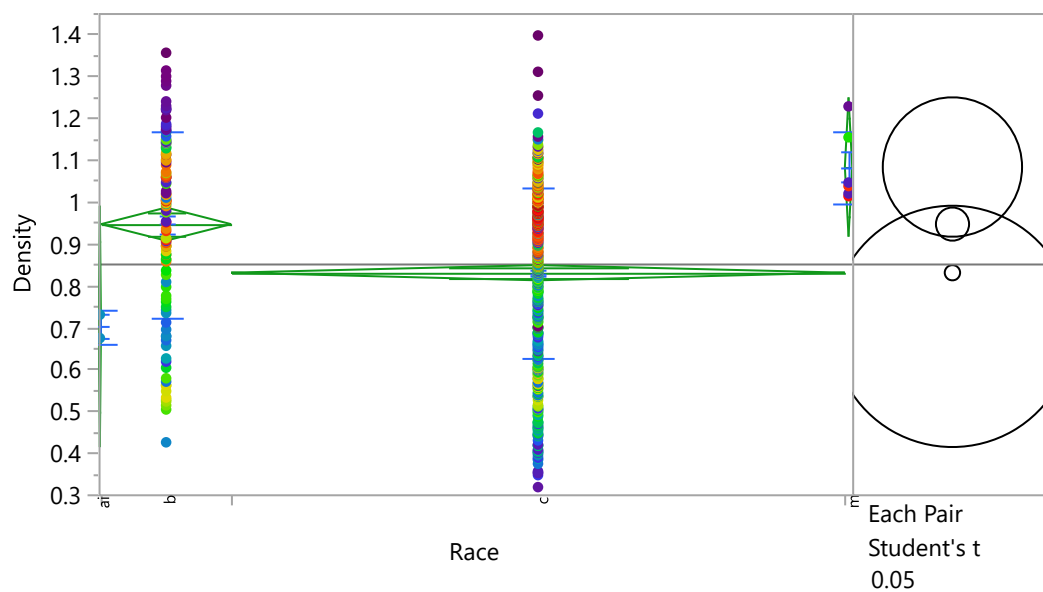

### Oneway Anova

#### Summary of Fit

|                            |          |
|----------------------------|----------|
| Rsquare                    | 0.055565 |
| Adj Rsquare                | 0.05092  |
| Root Mean Square Error     | 0.207632 |
| Mean of Response           | 0.851499 |
| Observations (or Sum Wgts) | 614      |

### Analysis of Variance

| Source   | DF  | Sum of Squares | Mean Square | F Ratio | Prob > F |
|----------|-----|----------------|-------------|---------|----------|
| Race     | 3   | 1.547201       | 0.515734    | 11.9629 | <.0001*  |
| Error    | 610 | 26.297743      | 0.043111    |         |          |
| C. Total | 613 | 27.844944      |             |         |          |

### Means for Oneway Anova

| Level | Mean    | Std Error | Lower 95% | Upper 95% |
|-------|---------|-----------|-----------|-----------|
| ai    | 0.70124 | 0.14682   | 0.41291   | 0.9896    |
| b     | 0.94560 | 0.02017   | 0.90600   | 0.9852    |
| c     | 0.82938 | 0.00929   | 0.81115   | 0.8476    |
| m     | 1.08200 | 0.08477   | 0.91553   | 1.2485    |

Std Error uses a pooled estimate of error variance

### Means and Std Deviations

| Level | Mean      | Std Dev   | Std Err   | Lower 95% | Upper 95% |
|-------|-----------|-----------|-----------|-----------|-----------|
|       |           |           | Mean      |           |           |
| ai    | 0.7012449 | 0.0395172 | 0.0279429 | 0.3461965 | 1.0562932 |
| b     | 0.9456043 | 0.2218004 | 0.0215432 | 0.9028882 | 0.9883204 |
| c     | 0.8293835 | 0.2055948 | 0.0091945 | 0.8113188 | 0.8474482 |
| m     | 1.0820001 | 0.0875512 | 0.0357426 | 0.9901208 | 1.1738794 |

## Means Comparisons

Comparisons for each pair using Student's t

Confidence Quantile

| t       | Alpha |
|---------|-------|
| 1.96386 | 0.05  |

## LSD Threshold Matrix

Abs(Dif)-LSD

|    | m        | b        | c        | ai       |
|----|----------|----------|----------|----------|
| m  | -0.23542 | -0.03472 | 0.08515  | 0.04782  |
| b  | -0.03472 | -0.05601 | 0.07262  | -0.04668 |
| c  | 0.08515  | 0.07262  | -0.02579 | -0.16077 |
| ai | 0.04782  | -0.04668 | -0.16077 | -0.40776 |

Positive values show pairs of means that are significantly different.

Levels not connected by same letter are significantly different.

## Ordered Differences Report

| Level | - Level | Difference | Std Err Dif | Lower CL  | Upper CL  | p-Value |  |
|-------|---------|------------|-------------|-----------|-----------|---------|--|
| m     | ai      | 0.3807553  | 0.1695308   | 0.047820  | 0.7136902 | 0.0251* |  |
| m     | c       | 0.2526166  | 0.0852725   | 0.085153  | 0.4200799 | 0.0032* |  |
| b     | ai      | 0.2443594  | 0.1481966   | -0.046678 | 0.5353969 | 0.0997  |  |
| m     | b       | 0.1363958  | 0.0871314   | -0.034718 | 0.3075098 | 0.1180  |  |
| c     | ai      | 0.1281386  | 0.1471114   | -0.160768 | 0.4170448 | 0.3841  |  |
| b     | c       | 0.1162208  | 0.0222020   | 0.072619  | 0.1598225 | <.0001* |  |

## Detailed Comparisons Report

### Comparing b with ai

|             |          |          |          |
|-------------|----------|----------|----------|
| Difference  | 0.24436  | t Ratio  | 1.648887 |
| Std Err Dif | 0.14820  | DF       | 610      |
| Upper CL    | 0.53540  | Prob >   | 0.0997   |
| Dif         | t        |          |          |
| Lower CL    | -0.04668 | Prob > t | 0.0498*  |
| Dif         |          |          |          |
| Confidence  | 0.95     | Prob < t | 0.9502   |

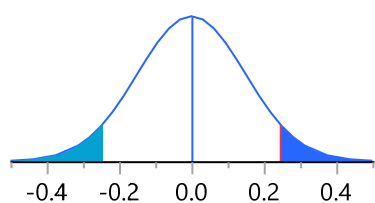

### Comparing c with ai

|             |          |          |          |
|-------------|----------|----------|----------|
| Difference  | 0.12814  | t Ratio  | 0.871032 |
| Std Err Dif | 0.14711  | DF       | 610      |
| Upper CL    | 0.41704  | Prob >   | 0.3841   |
| Dif         | t        |          |          |
| Lower CL    | -0.16077 | Prob > t | 0.1920   |
| Dif         |          |          |          |
| Confidence  | 0.95     | Prob < t | 0.8080   |

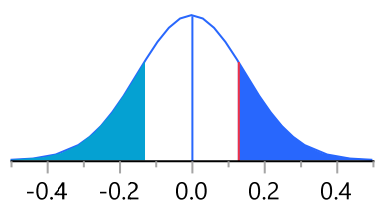

### Comparing c with b

|             |          |          |          |
|-------------|----------|----------|----------|
| Difference  | -0.11622 | t Ratio  | -5.23469 |
| Std Err Dif | 0.02220  | DF       | 610      |
| Upper CL    | -0.07262 | Prob >   | <.0001*  |
| Dif         |          | t        |          |
| Lower CL    | -0.15982 | Prob > t | 1.0000   |
| Dif         |          |          |          |
| Confidence  | 0.95     | Prob < t | <.0001*  |

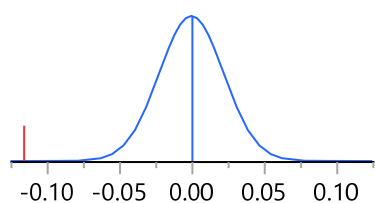

### Comparing m with ai

|             |          |          |          |
|-------------|----------|----------|----------|
| Difference  | 0.380755 | t Ratio  | 2.245935 |
| Std Err Dif | 0.169531 | DF       | 610      |
| Upper CL    | 0.713690 | Prob >   | 0.0251*  |
| Dif         |          | t        |          |
| Lower CL    | 0.047820 | Prob > t | 0.0125*  |
| Dif         |          |          |          |
| Confidence  | 0.95     | Prob < t | 0.9875   |

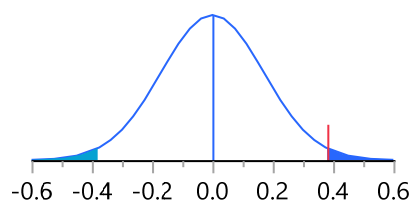

### Comparing m with b

|             |          |          |          |
|-------------|----------|----------|----------|
| Difference  | 0.13640  | t Ratio  | 1.565404 |
| Std Err Dif | 0.08713  | DF       | 610      |
| Upper CL    | 0.30751  | Prob >   | 0.1180   |
| Dif         | t        |          |          |
| Lower CL    | -0.03472 | Prob > t | 0.0590   |
| Dif         |          |          |          |
| Confidence  | 0.95     | Prob < t | 0.9410   |

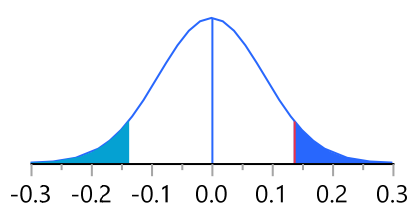

### Comparing m with c

|             |          |          |          |
|-------------|----------|----------|----------|
| Difference  | 0.252617 | t Ratio  | 2.962463 |
| Std Err Dif | 0.085272 | DF       | 610      |
| Upper CL    | 0.420080 | Prob >   | 0.0032*  |
| Dif         | t        |          |          |
| Lower CL    | 0.085153 | Prob > t | 0.0016*  |
| Dif         |          |          |          |
| Confidence  | 0.95     | Prob < t | 0.9984   |

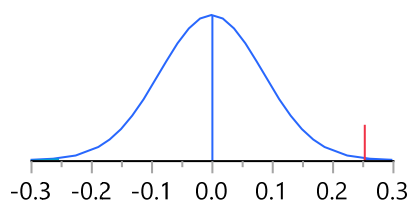



**CDF Plot**

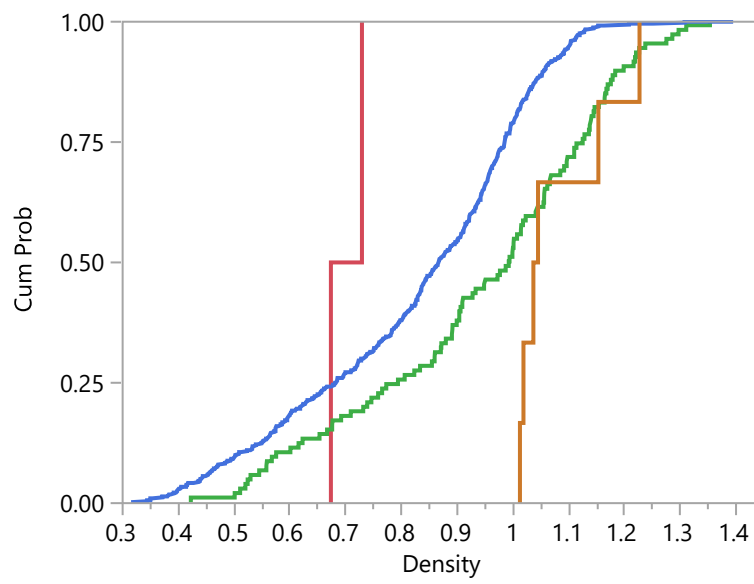

— ai  
— b  
— c  
— m

**Compare Densities**

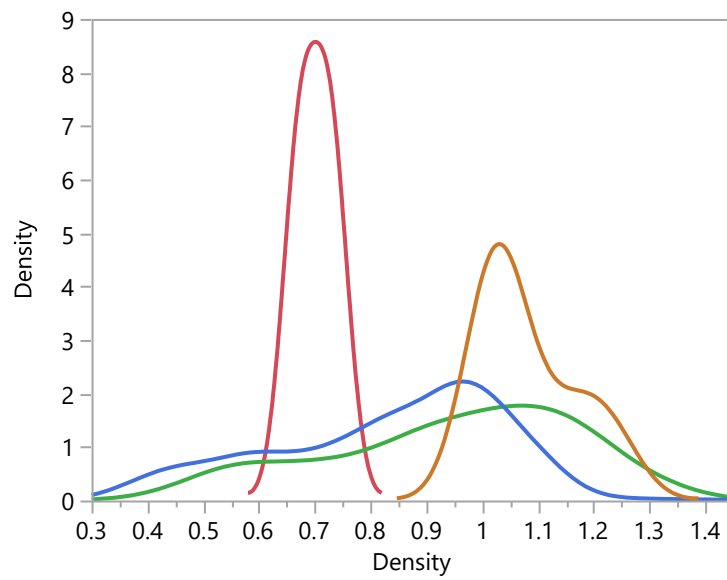

— ai  
— b  
— c  
— m

Missing Rows62

Bivariate Fit of Density By BMI

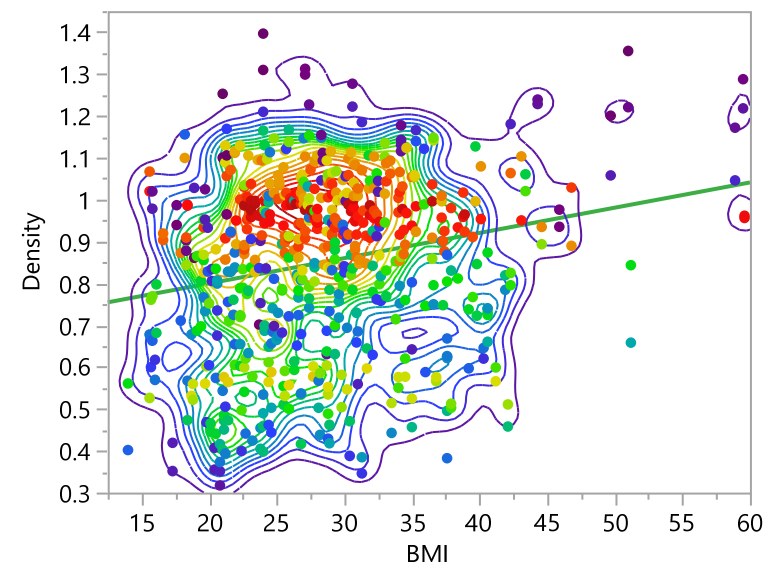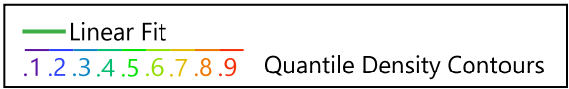

Linear Fit

Density = 0.6791666 + 0.0060304\*BMI

Summary of Fit

|                            |          |
|----------------------------|----------|
| RSquare                    | 0.044759 |
| RSquare Adj                | 0.043198 |
| Root Mean Square Error     | 0.208475 |
| Mean of Response           | 0.851499 |
| Observations (or Sum Wgts) | 614      |

## Analysis of Variance

| Source   | DF  | Sum of Squares | Mean Square | F Ratio            |
|----------|-----|----------------|-------------|--------------------|
| Model    | 1   | 1.246308       | 1.24631     | 28.6759            |
| Error    | 612 | 26.598636      | 0.04346     | <b>Prob &gt; F</b> |
| C. Total | 613 | 27.844944      |             | <.0001*            |

## Parameter Estimates

| Term      | Estimate  | Std Error | t Ratio | Prob> t |
|-----------|-----------|-----------|---------|---------|
| Intercept | 0.6791666 | 0.033263  | 20.42   | <.0001* |
| BMI       | 0.0060304 | 0.001126  | 5.35    | <.0001* |

## Diagnostics Plots

### Residual by Predicted Plot

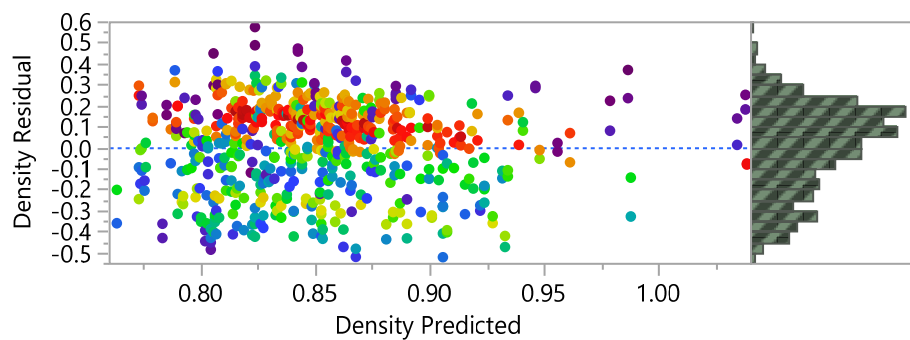

**Actual by Predicted Plot**

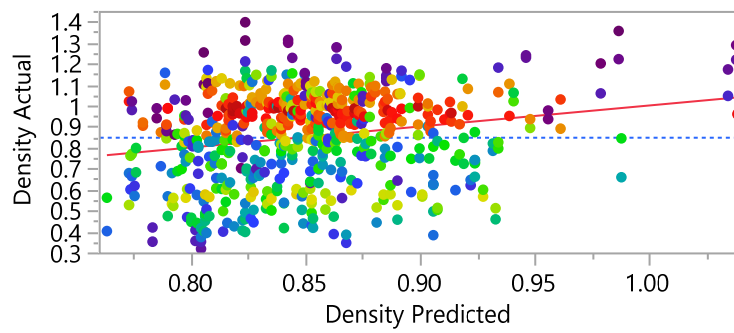

**Residual by Row Plot**

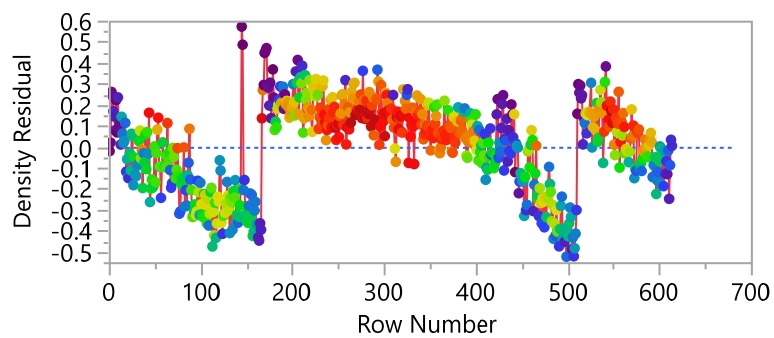

**Residual by X Plot**

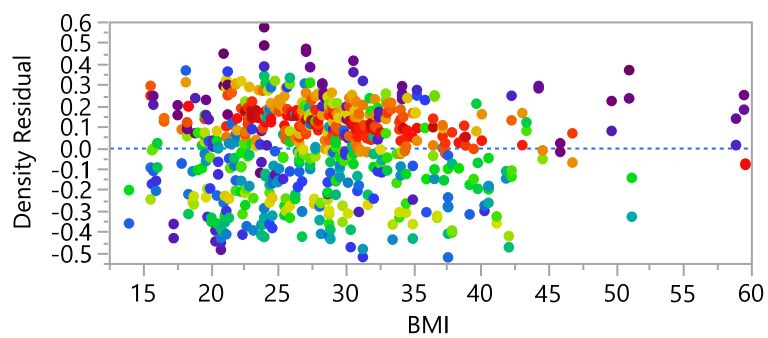

Residual Normal Quantile Plot

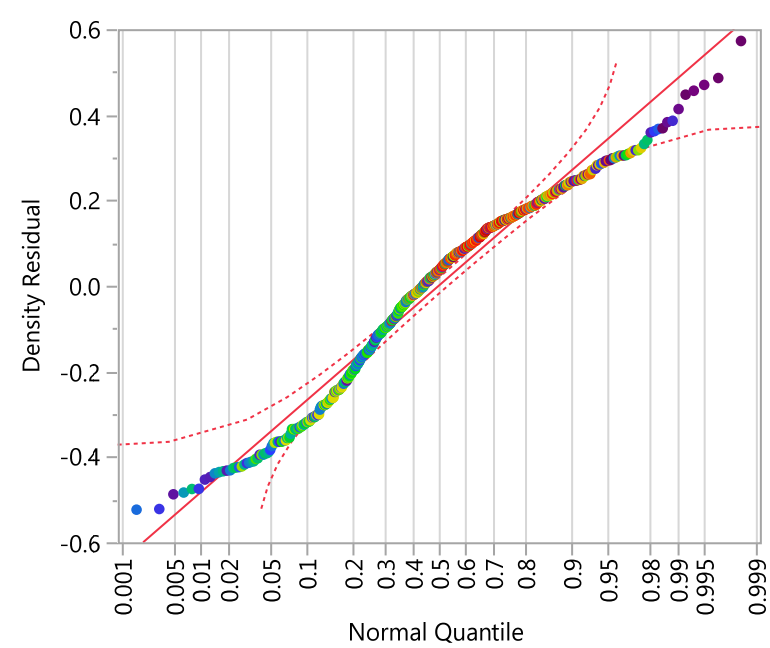

Quantile Density Contours

| Variable | Kernel Std |
|----------|------------|
| BMI      | 1.282373   |
| Density  | 0.036553   |

Bivariate Fit of Density By Weight (lbs)

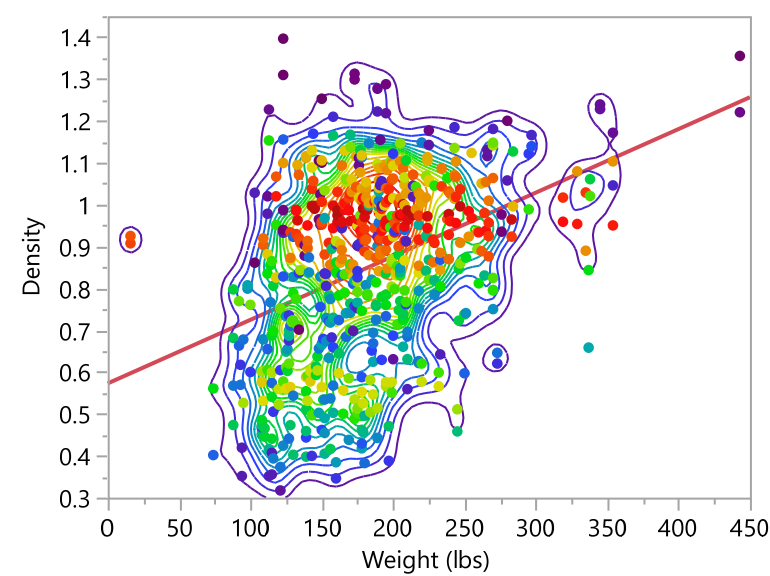

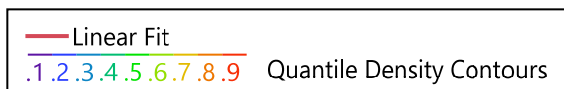

## Linear Fit

Density = 0.5729131 + 0.0015183\*Weight (lbs)

## Summary of Fit

|                            |          |
|----------------------------|----------|
| RSquare                    | 0.149399 |
| RSquare Adj                | 0.14801  |
| Root Mean Square Error     | 0.196725 |
| Mean of Response           | 0.851499 |
| Observations (or Sum Wgts) | 614      |

## Analysis of Variance

| Source   | DF  | Sum of Squares | Mean Square | F Ratio            |
|----------|-----|----------------|-------------|--------------------|
| Model    | 1   | 4.160019       | 4.16002     | 107.4917           |
| Error    | 612 | 23.684925      | 0.03870     | <b>Prob &gt; F</b> |
| C. Total | 613 | 27.844944      |             | <.0001*            |

## Parameter Estimates

| Term      | Estimate  | Std Error | t Ratio | Prob> t |
|-----------|-----------|-----------|---------|---------|
| Intercept | 0.5729131 | 0.028019  | 20.45   | <.0001* |

| Term   | Estimate  | Std Error | t Ratio | Prob> t |
|--------|-----------|-----------|---------|---------|
| Weight | 0.0015183 | 0.000146  | 10.37   | <.0001* |
| (lbs)  |           |           |         |         |

## Diagnostics Plots

### Residual by Predicted Plot

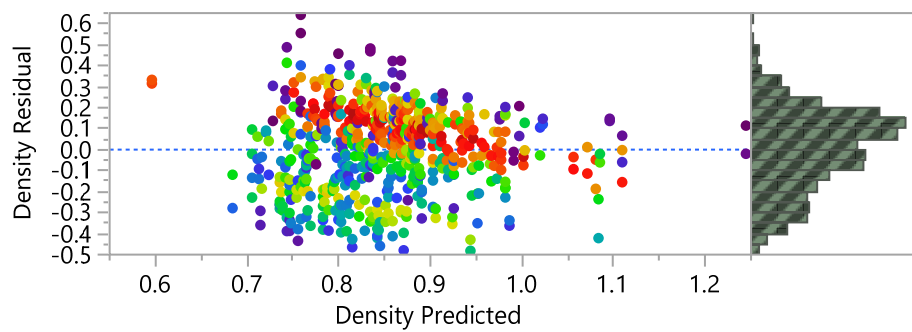

### Actual by Predicted Plot

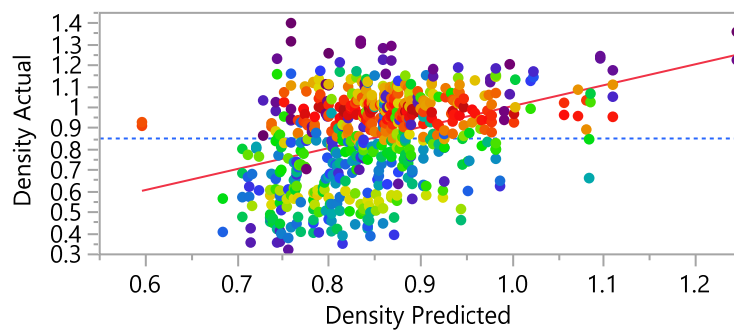

### Residual by Row Plot

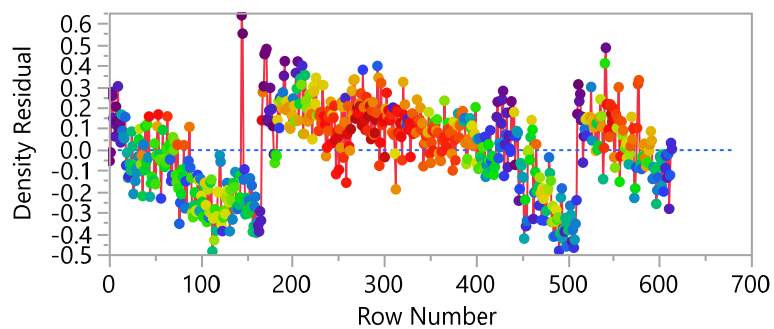

Residual by X Plot

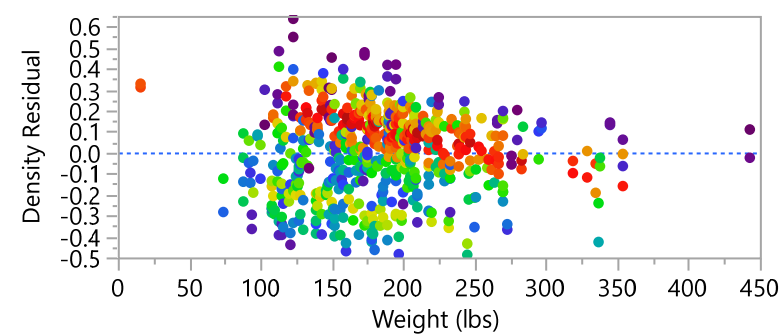

Residual Normal Quantile Plot

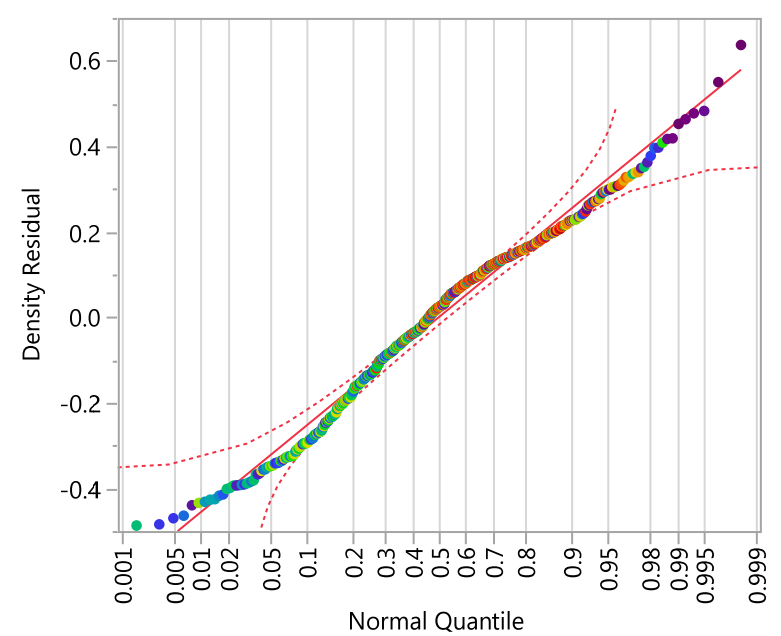

Quantile Density Contours

| Variable | Kernel Std |
|----------|------------|
| Weight   | 9.305238   |
| (lbs)    |            |
| Density  | 0.036553   |



**Bivariate Fit of Density By Height (feet, inches)**

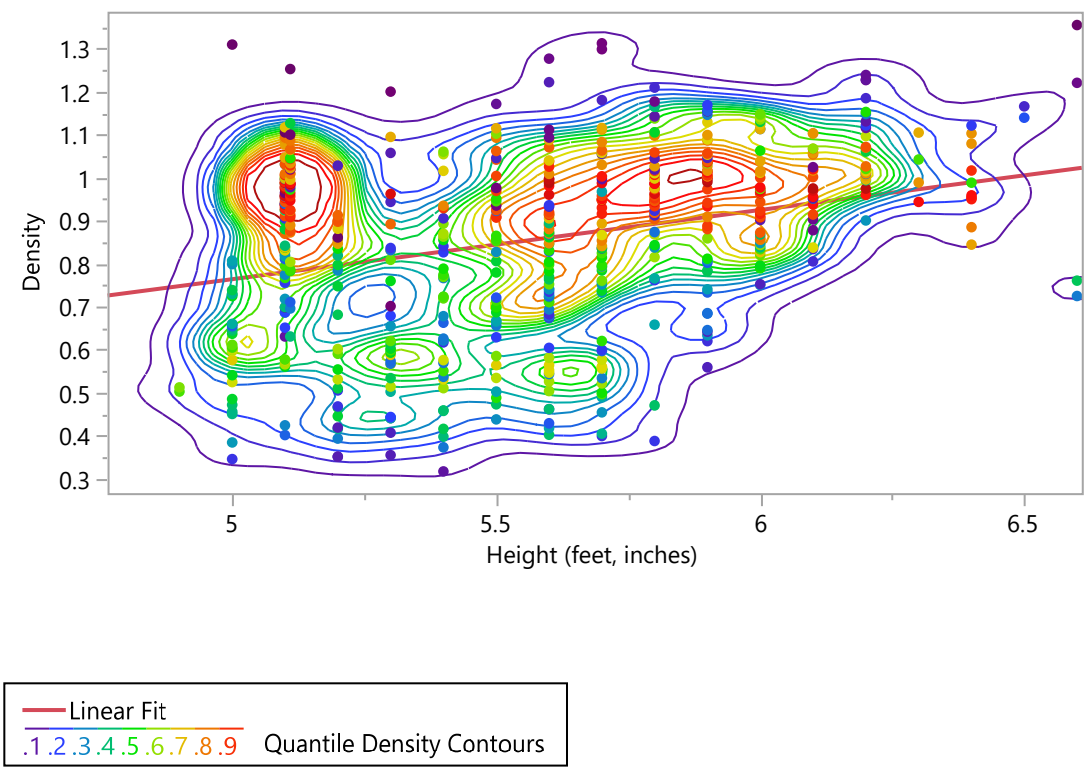

**Linear Fit**

Density = -0.040764 + 0.1609694\*Height (feet, inches)

**Summary of Fit**

|                            |          |
|----------------------------|----------|
| RSquare                    | 0.110172 |
| RSquare Adj                | 0.108718 |
| Root Mean Square Error     | 0.20121  |
| Mean of Response           | 0.851499 |
| Observations (or Sum Wgts) | 614      |

**Analysis of Variance**

| Source   | DF  | Sum of Squares | Mean Square | F Ratio            |
|----------|-----|----------------|-------------|--------------------|
| Model    | 1   | 3.067720       | 3.06772     | 75.7730            |
| Error    | 612 | 24.777224      | 0.04049     | <b>Prob &gt; F</b> |
| C. Total | 613 | 27.844944      |             | <.0001*            |

### Parameter Estimates

| Term                        | Estimate  | Std Error | t Ratio | Prob> t |
|-----------------------------|-----------|-----------|---------|---------|
| Intercept                   | -0.040764 | 0.102824  | -0.40   | 0.6919  |
| Height<br>(feet,<br>inches) | 0.1609694 | 0.018492  | 8.70    | <.0001* |

### Diagnostics Plots

#### Residual by Predicted Plot

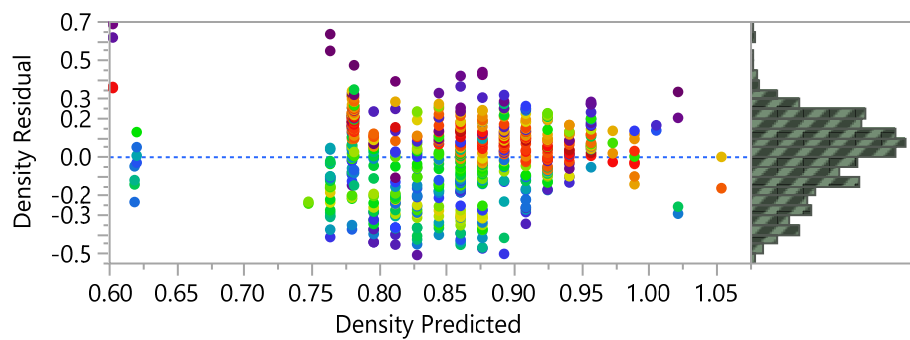

#### Actual by Predicted Plot

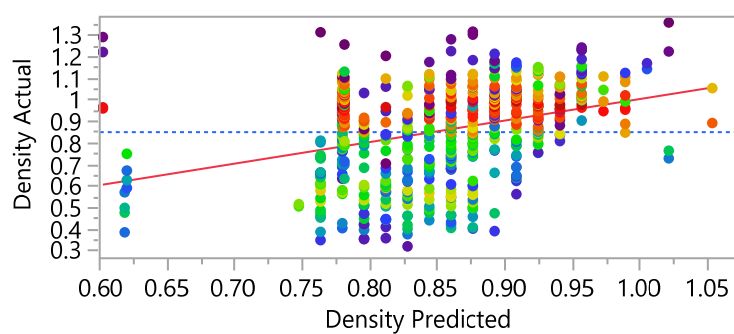

**Residual by Row Plot**

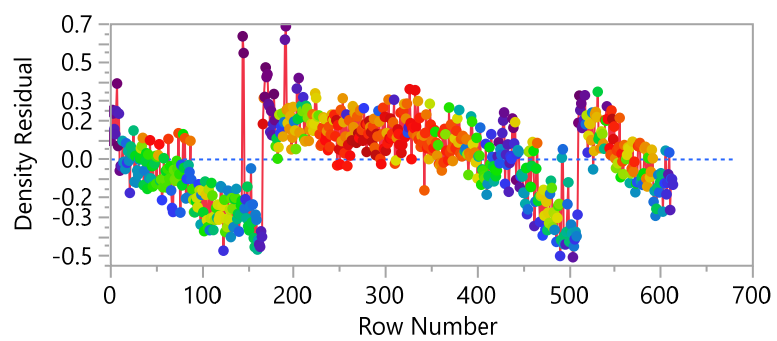

**Residual by X Plot**

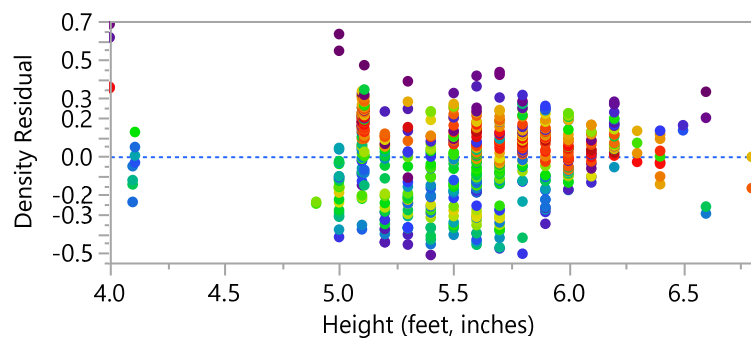

**Residual Normal Quantile Plot**

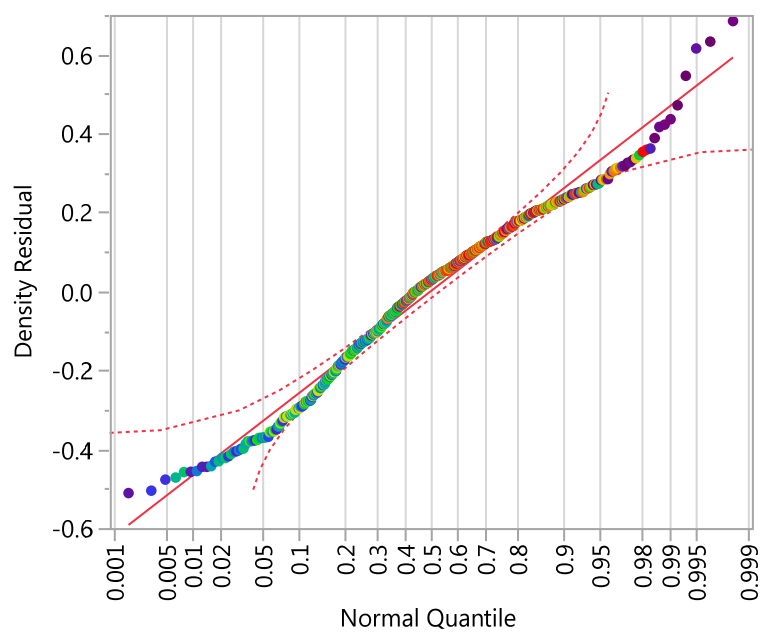

Quantile Density Contours

| Variable              | Kernel Std |
|-----------------------|------------|
| Height (feet, inches) | 0.075372   |
| Density               | 0.036553   |

Bivariate Fit of Density By Maximum von Mises Stress(MPa)

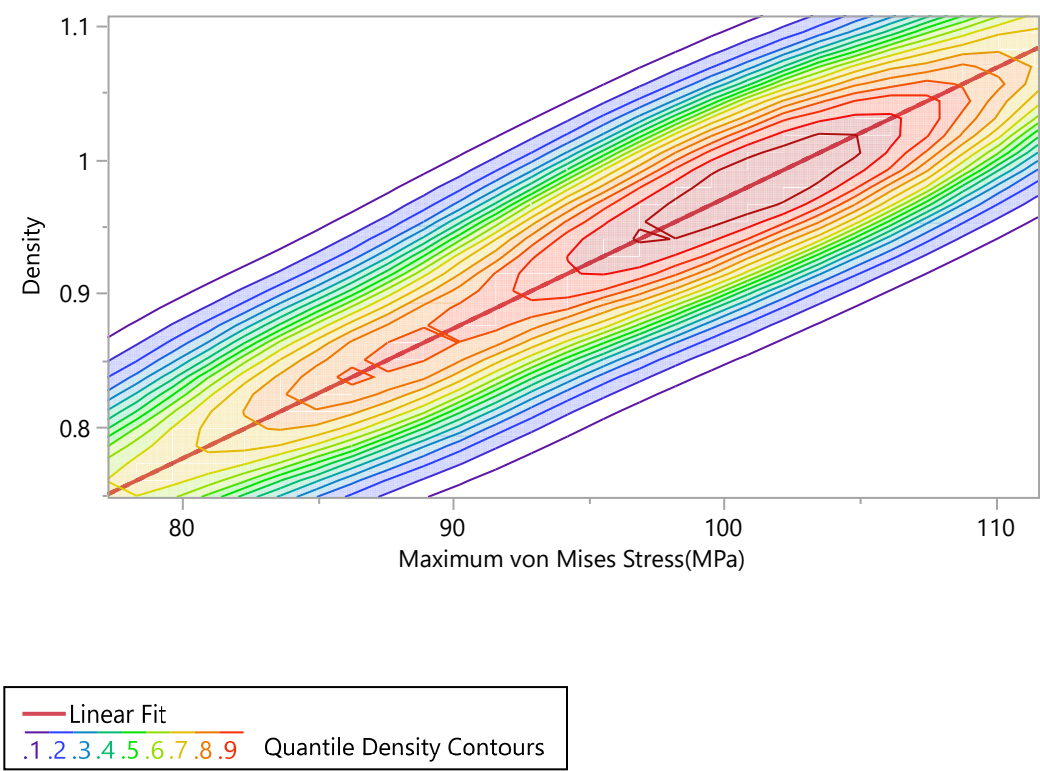

Linear Fit

Density = 4.352e-11 + 0.0097057\*Maximum von Mises Stress(MPa)

Summary of Fit

|             |   |
|-------------|---|
| RSquare     | 1 |
| RSquare Adj | 1 |

Root Mean Square Error                      0

Mean of Response                      0.851499

Observations    (or    Sum                      614

Wgts)

## Analysis of Variance

| Source   | DF  | Sum of Squares | Mean Square | F Ratio            |
|----------|-----|----------------|-------------|--------------------|
| Model    | 1   | 27.844944      | 27.8449     | .                  |
| Error    | 612 | 0.000000       | 0.0000      | <b>Prob &gt; F</b> |
| C. Total | 613 | 27.844944      |             | .                  |

## Parameter Estimates

| Term                |           | Estimate  | Std Error | t Ratio | Prob> t |
|---------------------|-----------|-----------|-----------|---------|---------|
| Intercept           |           | 4.352e-11 | 0         | .       | .       |
| Maximum Stress(MPa) | von Mises | 0.0097057 | 0         | .       | .       |

## Diagnostics Plots

### Residual by Predicted Plot

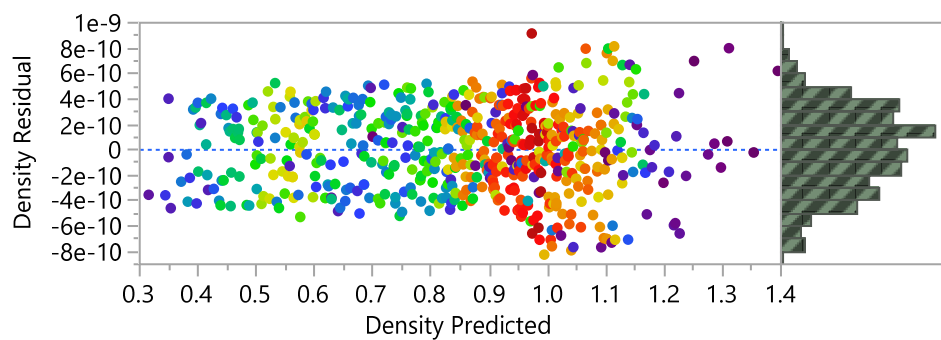

**Actual by Predicted Plot**

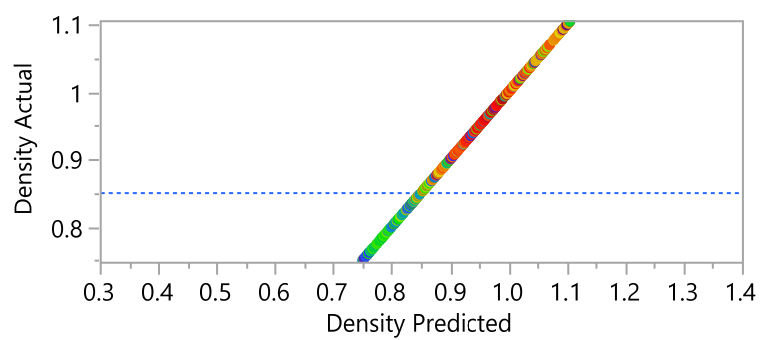

**Residual by Row Plot**

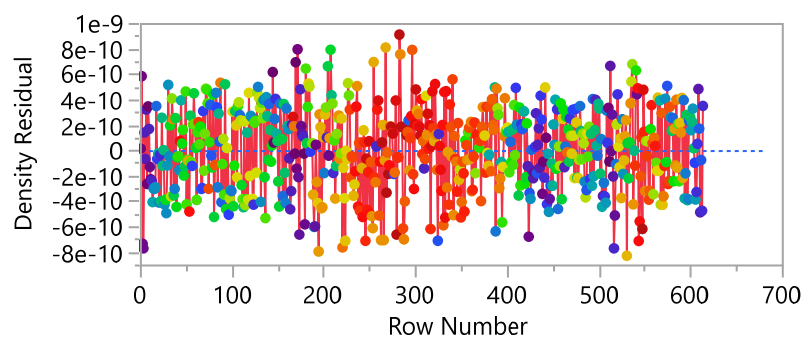

**Residual by X Plot**

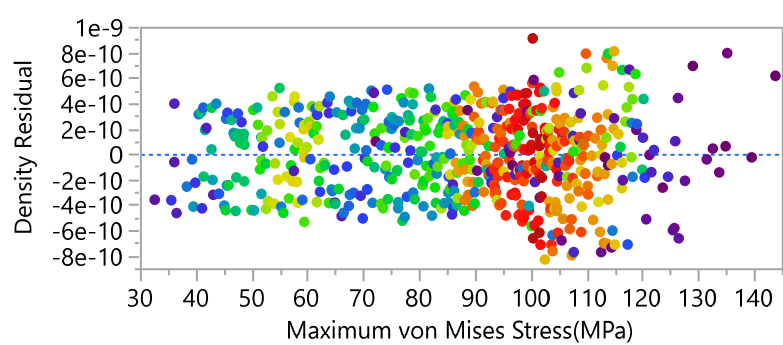

Residual Normal Quantile Plot

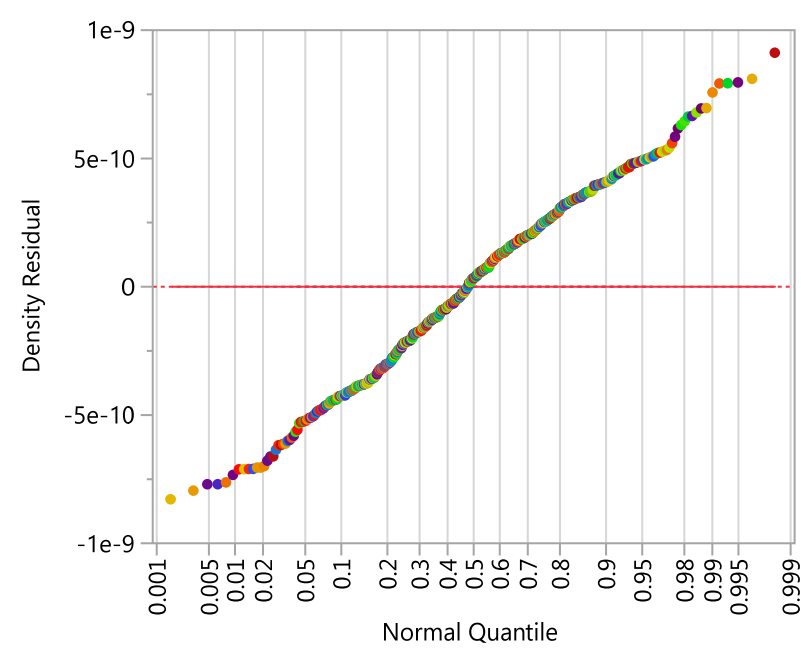

Quantile Density Contours

| Variable    |     |       | Kernel Std |
|-------------|-----|-------|------------|
| Maximum     | von | Mises | 3.766087   |
| Stress(MPa) |     |       |            |
| Density     |     |       | 0.036553   |
